# Supplementary material
Source: PubMed Central journal article supplement (PMC3355195)
Supplement: NIHMS355139-supplement-02.pdf [file NIHMS355139-supplement-02.pdf]

**Supplementary Table 1:** Expression of HDAC-family members in the training set

| Gene<br>Symbol | HCC vs. Normal |         | HCC vs. Cirrhosis |         | HCC vs. Dysplastic Nodules |         |
|----------------|----------------|---------|-------------------|---------|----------------------------|---------|
|                | Score          | p-value | Score             | p-value | score                      | p-value |
| HDAC1          | 2.467          | 0.042   | 2.437             | 0.046   | 5.349                      | 0.00    |
| HDAC2          | 3.312          | 0.004   | 2.995             | 0.004   | 5.007                      | <0.001  |
| HDAC3          | 0.186          | n.s.    | 5.774             | <0.001  | 6.121                      | <0.001  |
| HDAC4          | 4.153          | 0.004   | 3.901             | 0.008   | 9.645                      | <0.001  |
| HDAC5          | 2.424          | 0.042   | 4.997             | 0.002   | 7.027                      | <0.001  |
| HDAC6          | -4.799         | <0.001  | -7.326            | <0.001  | -9.014                     | <0.001  |
| HDAC7a         | -4.264         | <0.001  | -1.742            | 0.054   | -2.584                     | 0.008   |
| HDAC8          | -0.834         | n.s.    | 0.986             | n.s.    | 2.193                      | 0.034   |
| HDAC9          | -1.265         | n.s.    | -2.245            | n.s.    | -2.334                     | 0.006   |
| HDAC10         | -2.481         | 0.04    | 0.275             | n.s.    | -1.013                     | n.s.    |
| HDAC11         | 2.546          | 0.02    | 3.930             | <0.001  | 4.692                      | <0.001  |
