# Supplementary material
Source: PubMed Central journal article supplement (PMC3355195)
Supplement: NIHMS355139-supplement-03.pdf [file NIHMS355139-supplement-03.pdf]

**Supplementary Table 2:** Expression of HDAC-family members in the validation set

| Gene Symbol | HCC vs. paired non-tumor liver tissue |         |
|-------------|---------------------------------------|---------|
|             | Score                                 | p-value |
| HDAC1       | 12.392                                | <0.001  |
| HDAC2       | 15.713                                | <0.001  |
| HDAC3       | -0.326                                | n.s.    |
| HDAC4       | 12.307                                | <0.001  |
| HDAC5       | 9.207                                 | <0.001  |
| HDAC6       | -11.670                               | <0.001  |
| HDAC7a      | -3.494                                | <0.001  |
| HDAC9       | -6.476                                | <0.001  |
| HDAC11      | -0.823                                | n.s.    |
