# Supplementary material
Source: PubMed Central journal article supplement (PMC3355195)

Suppl. Fig. 1

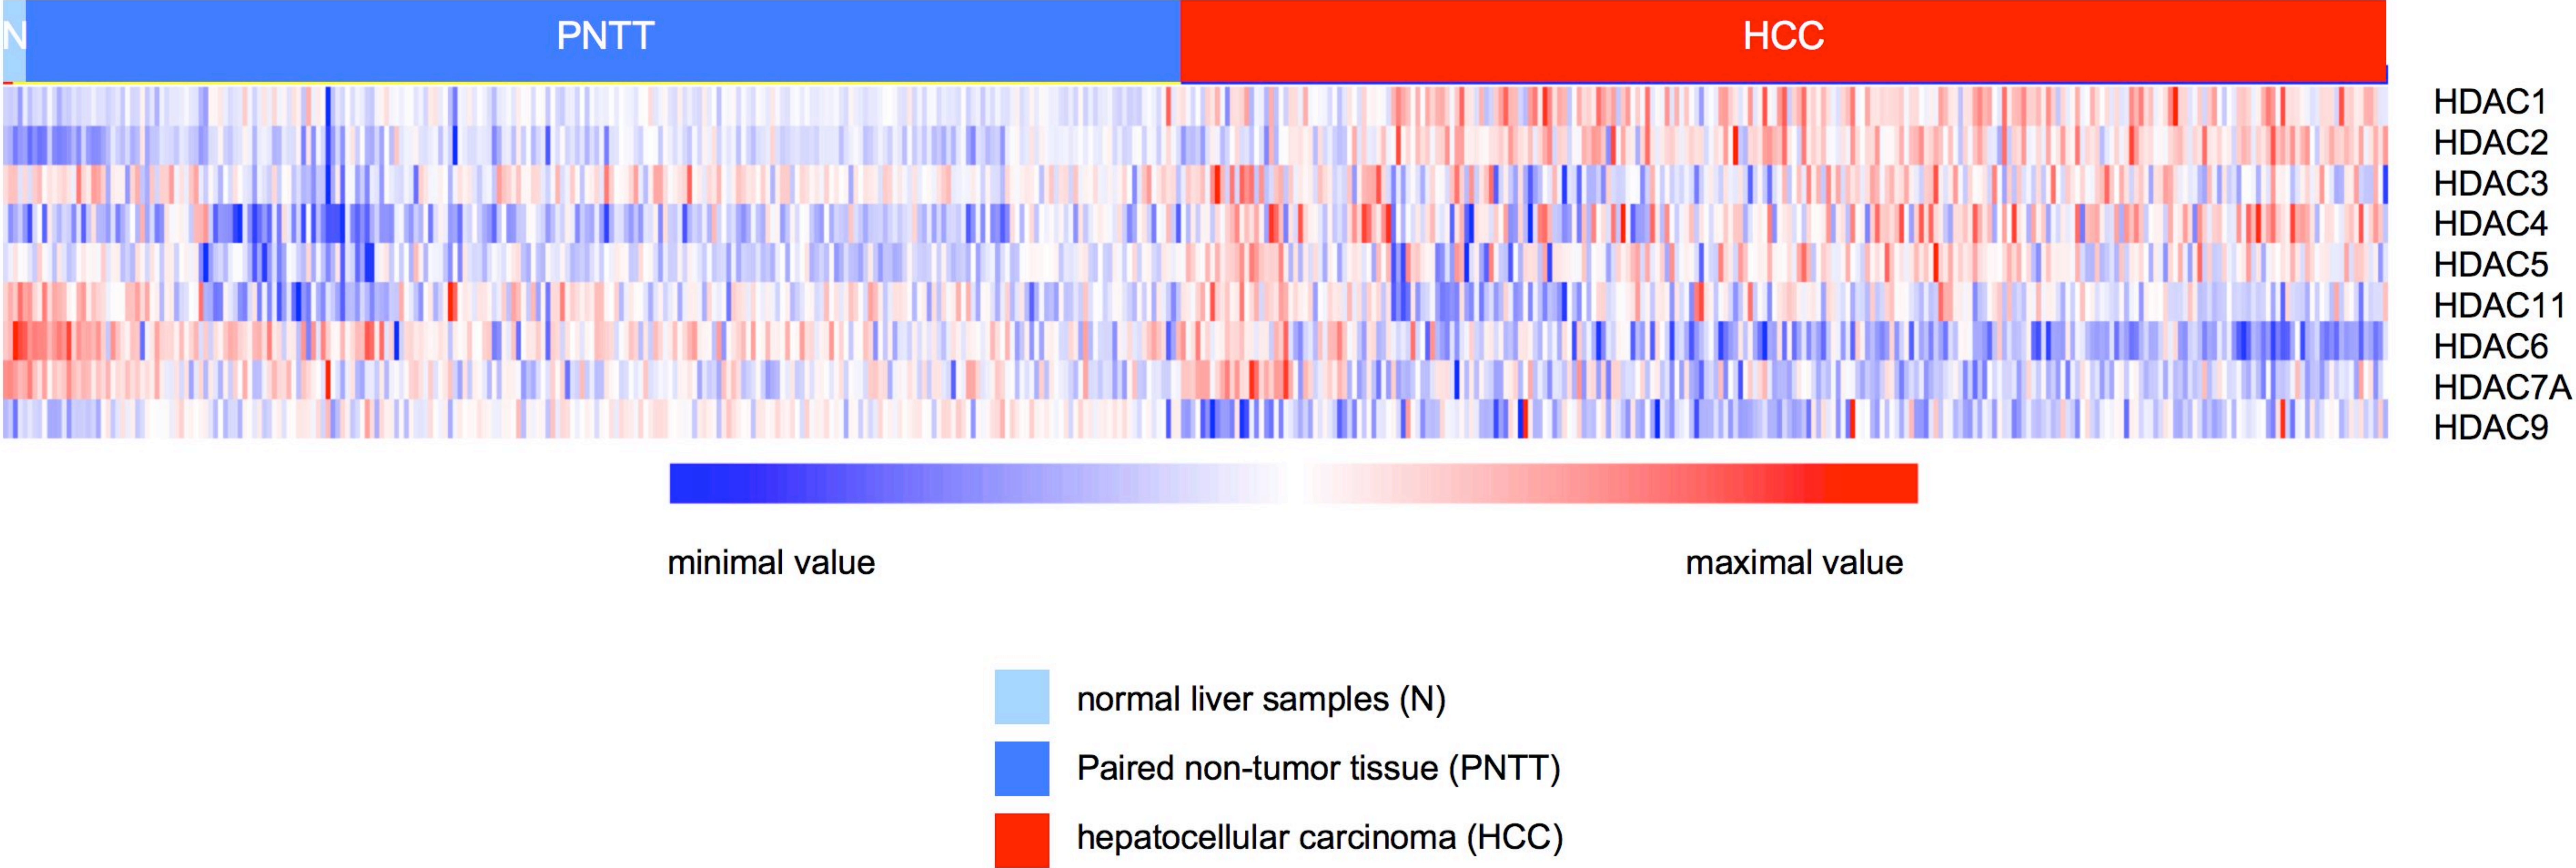

Supplement: NIHMS355139-supplement-04.pdf [file NIHMS355139-supplement-04.pdf]

A

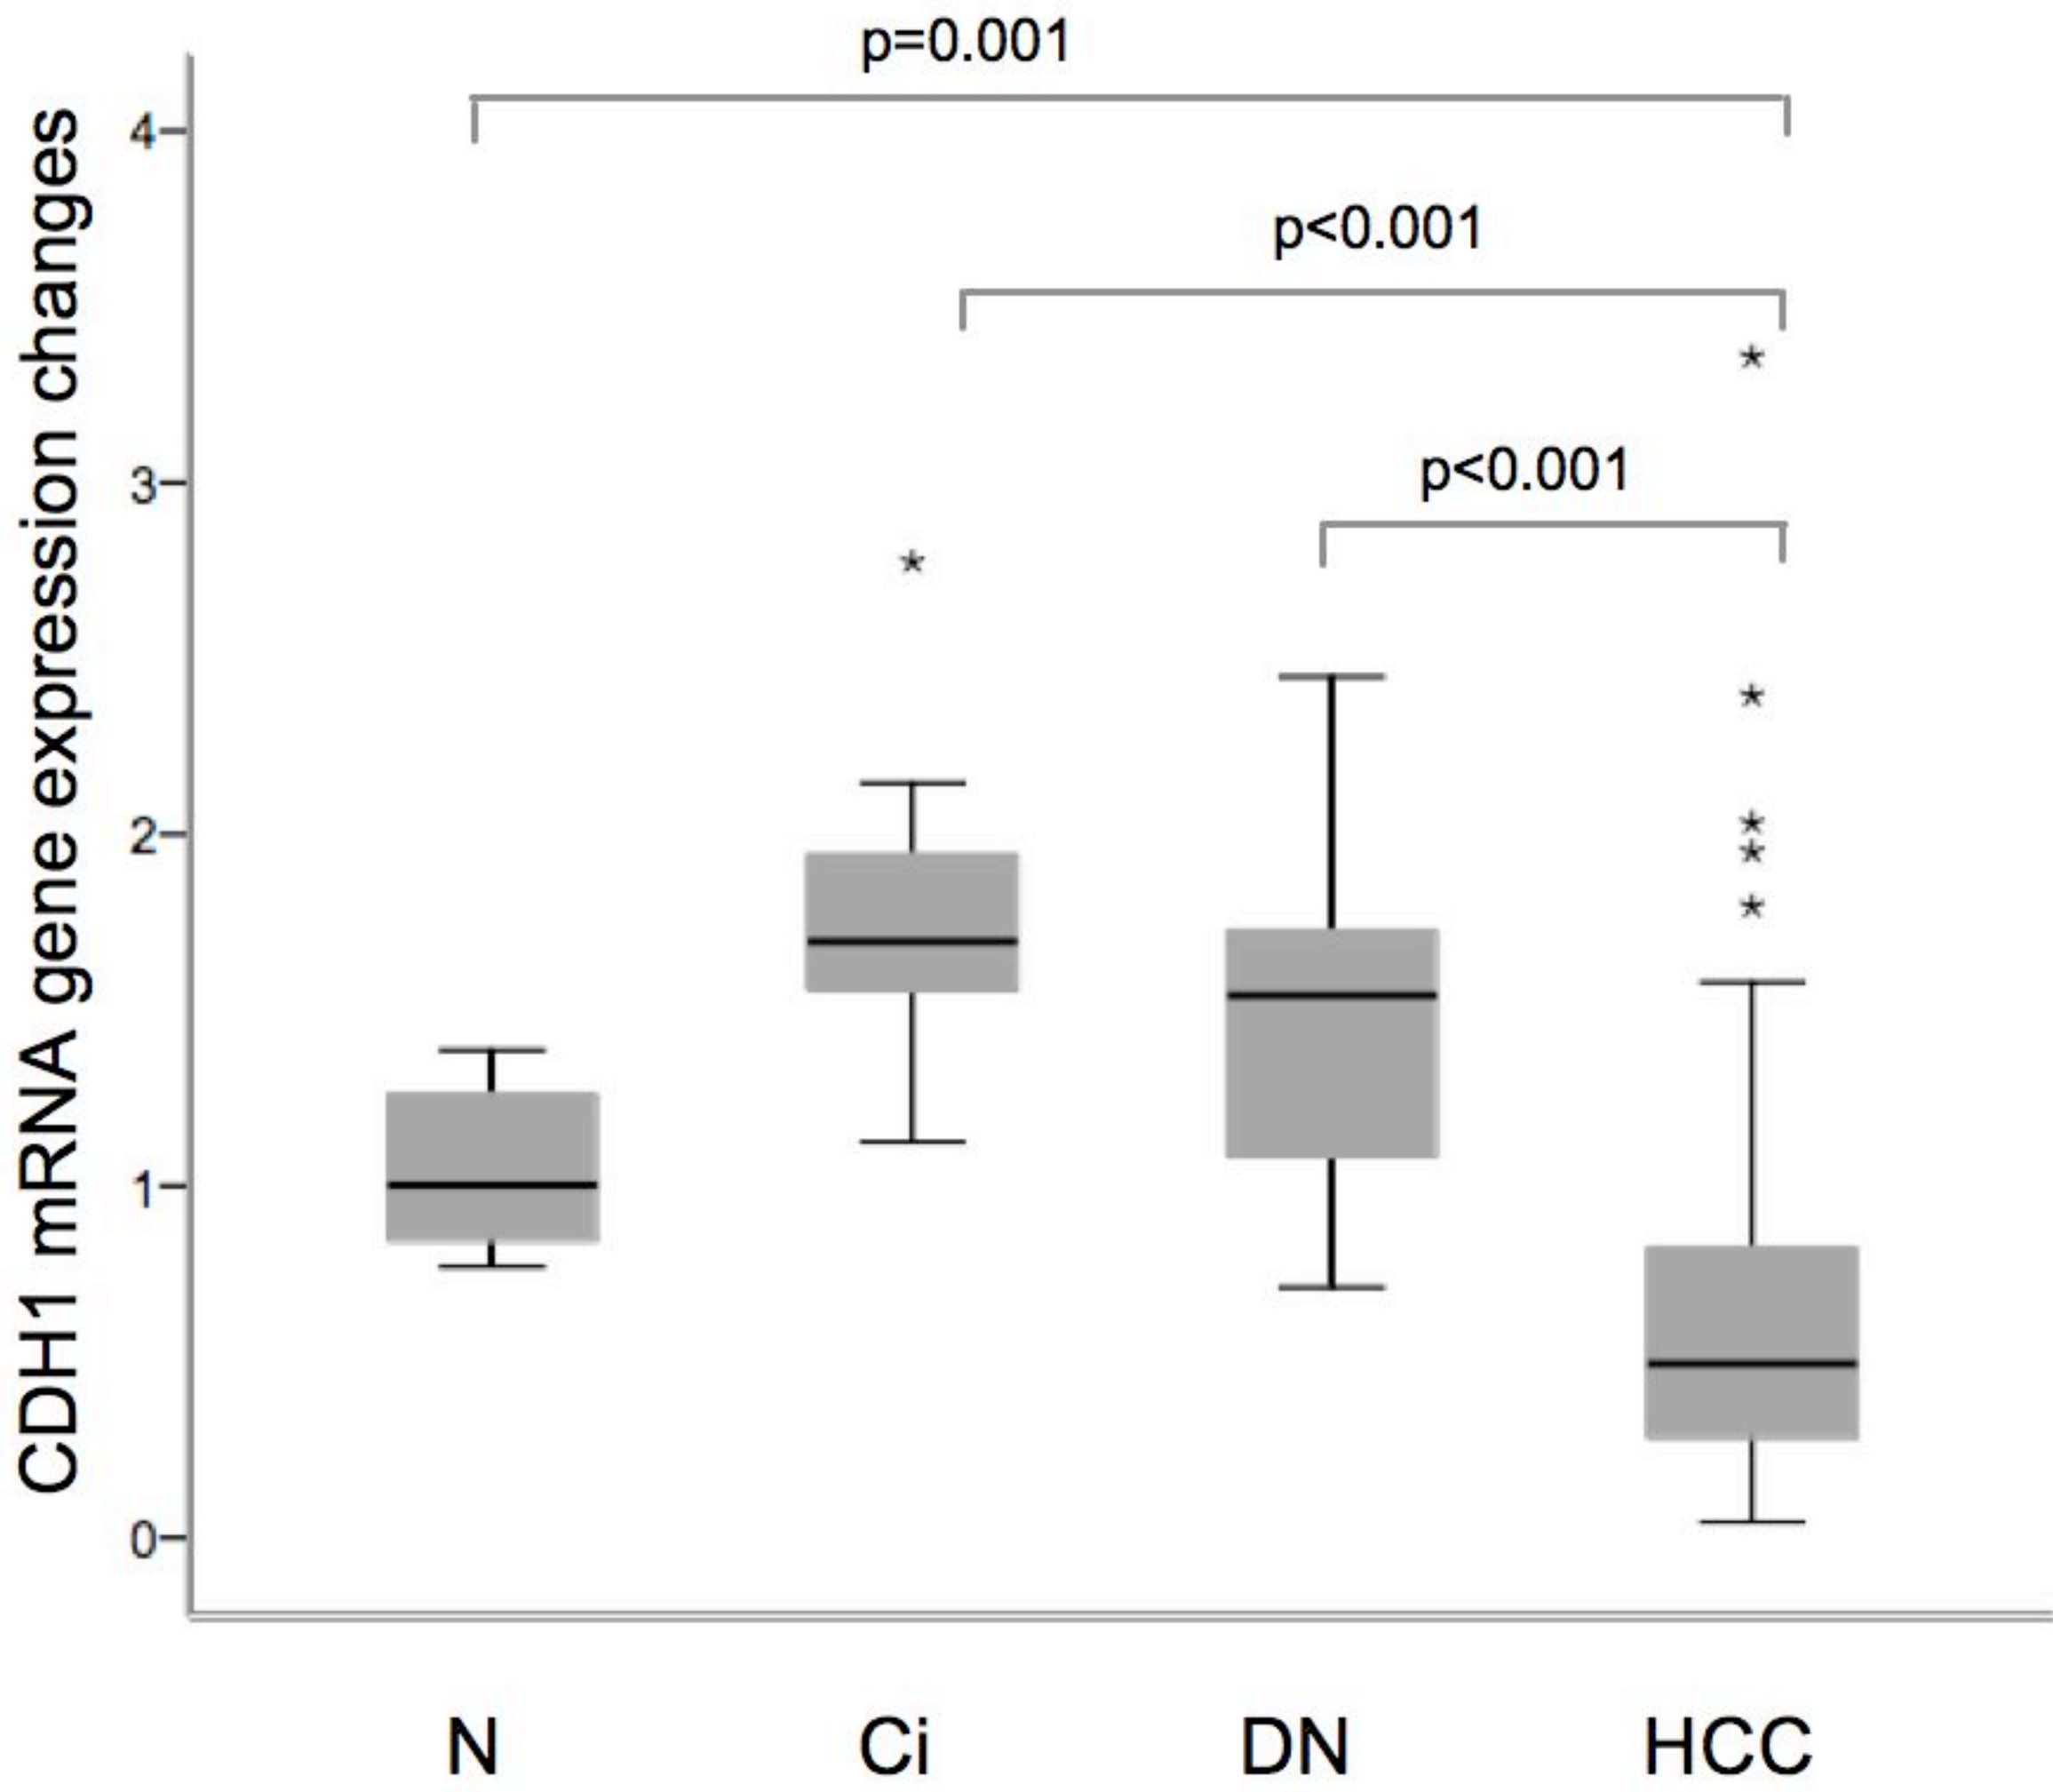

B

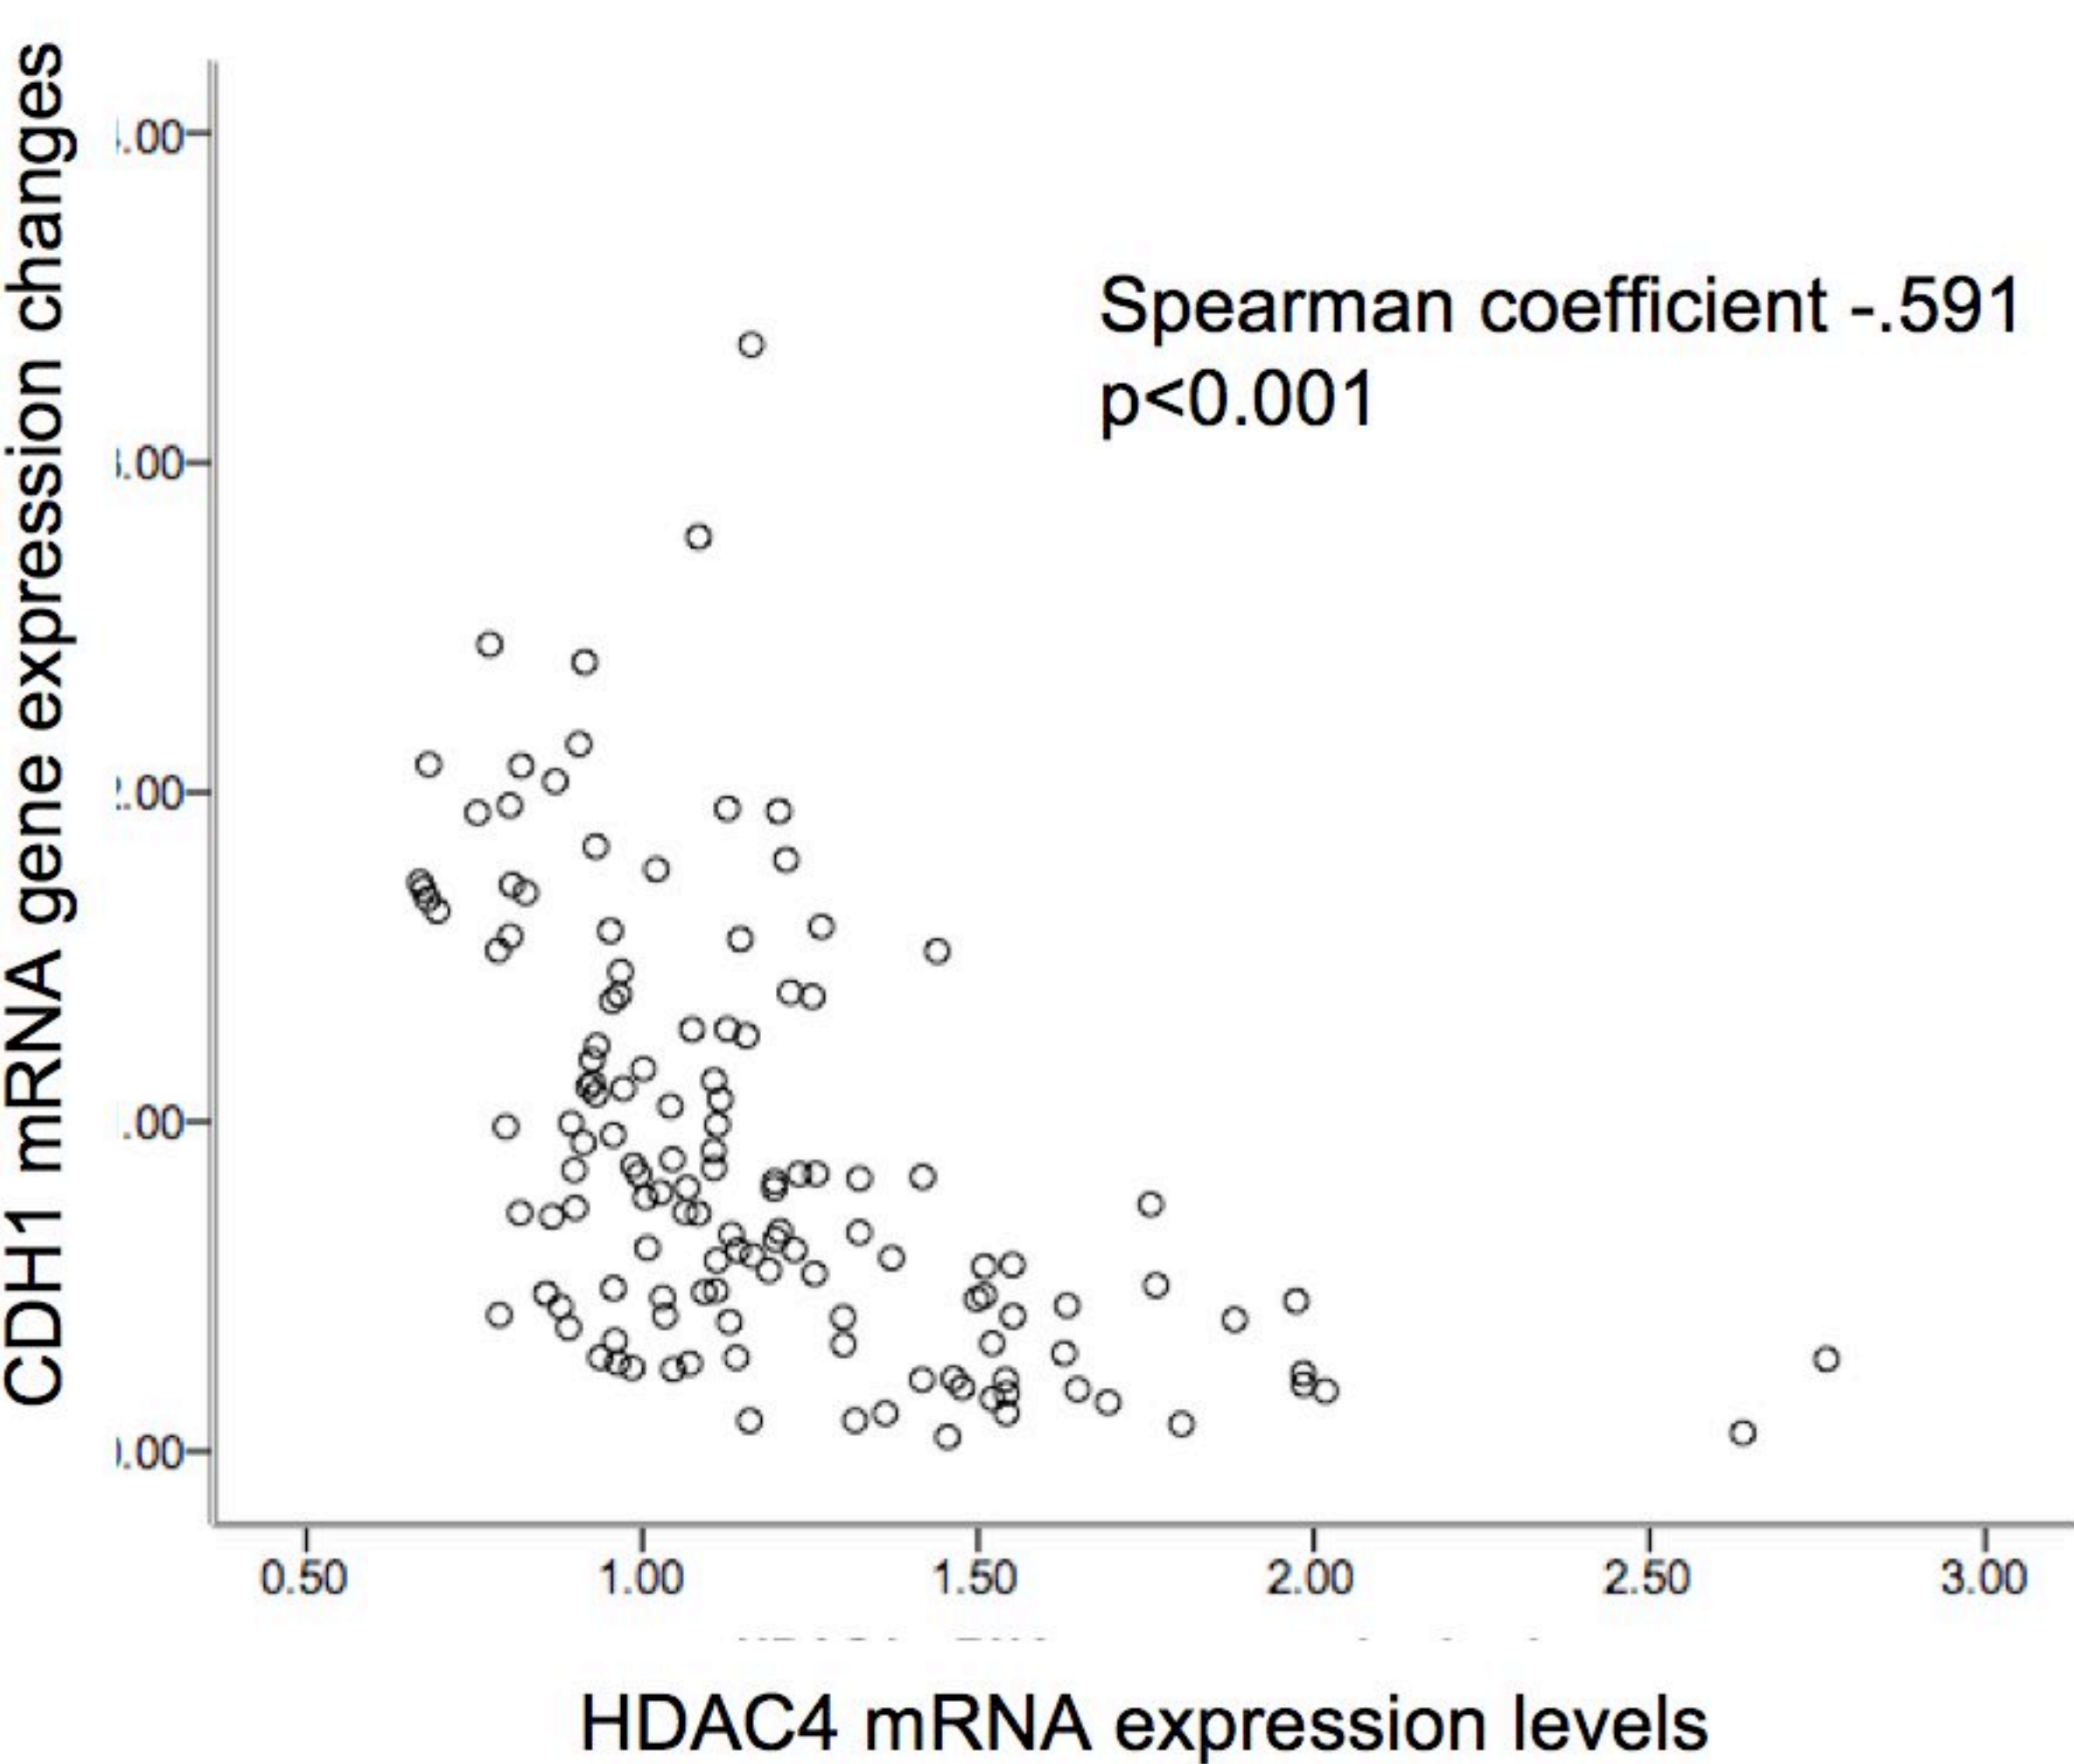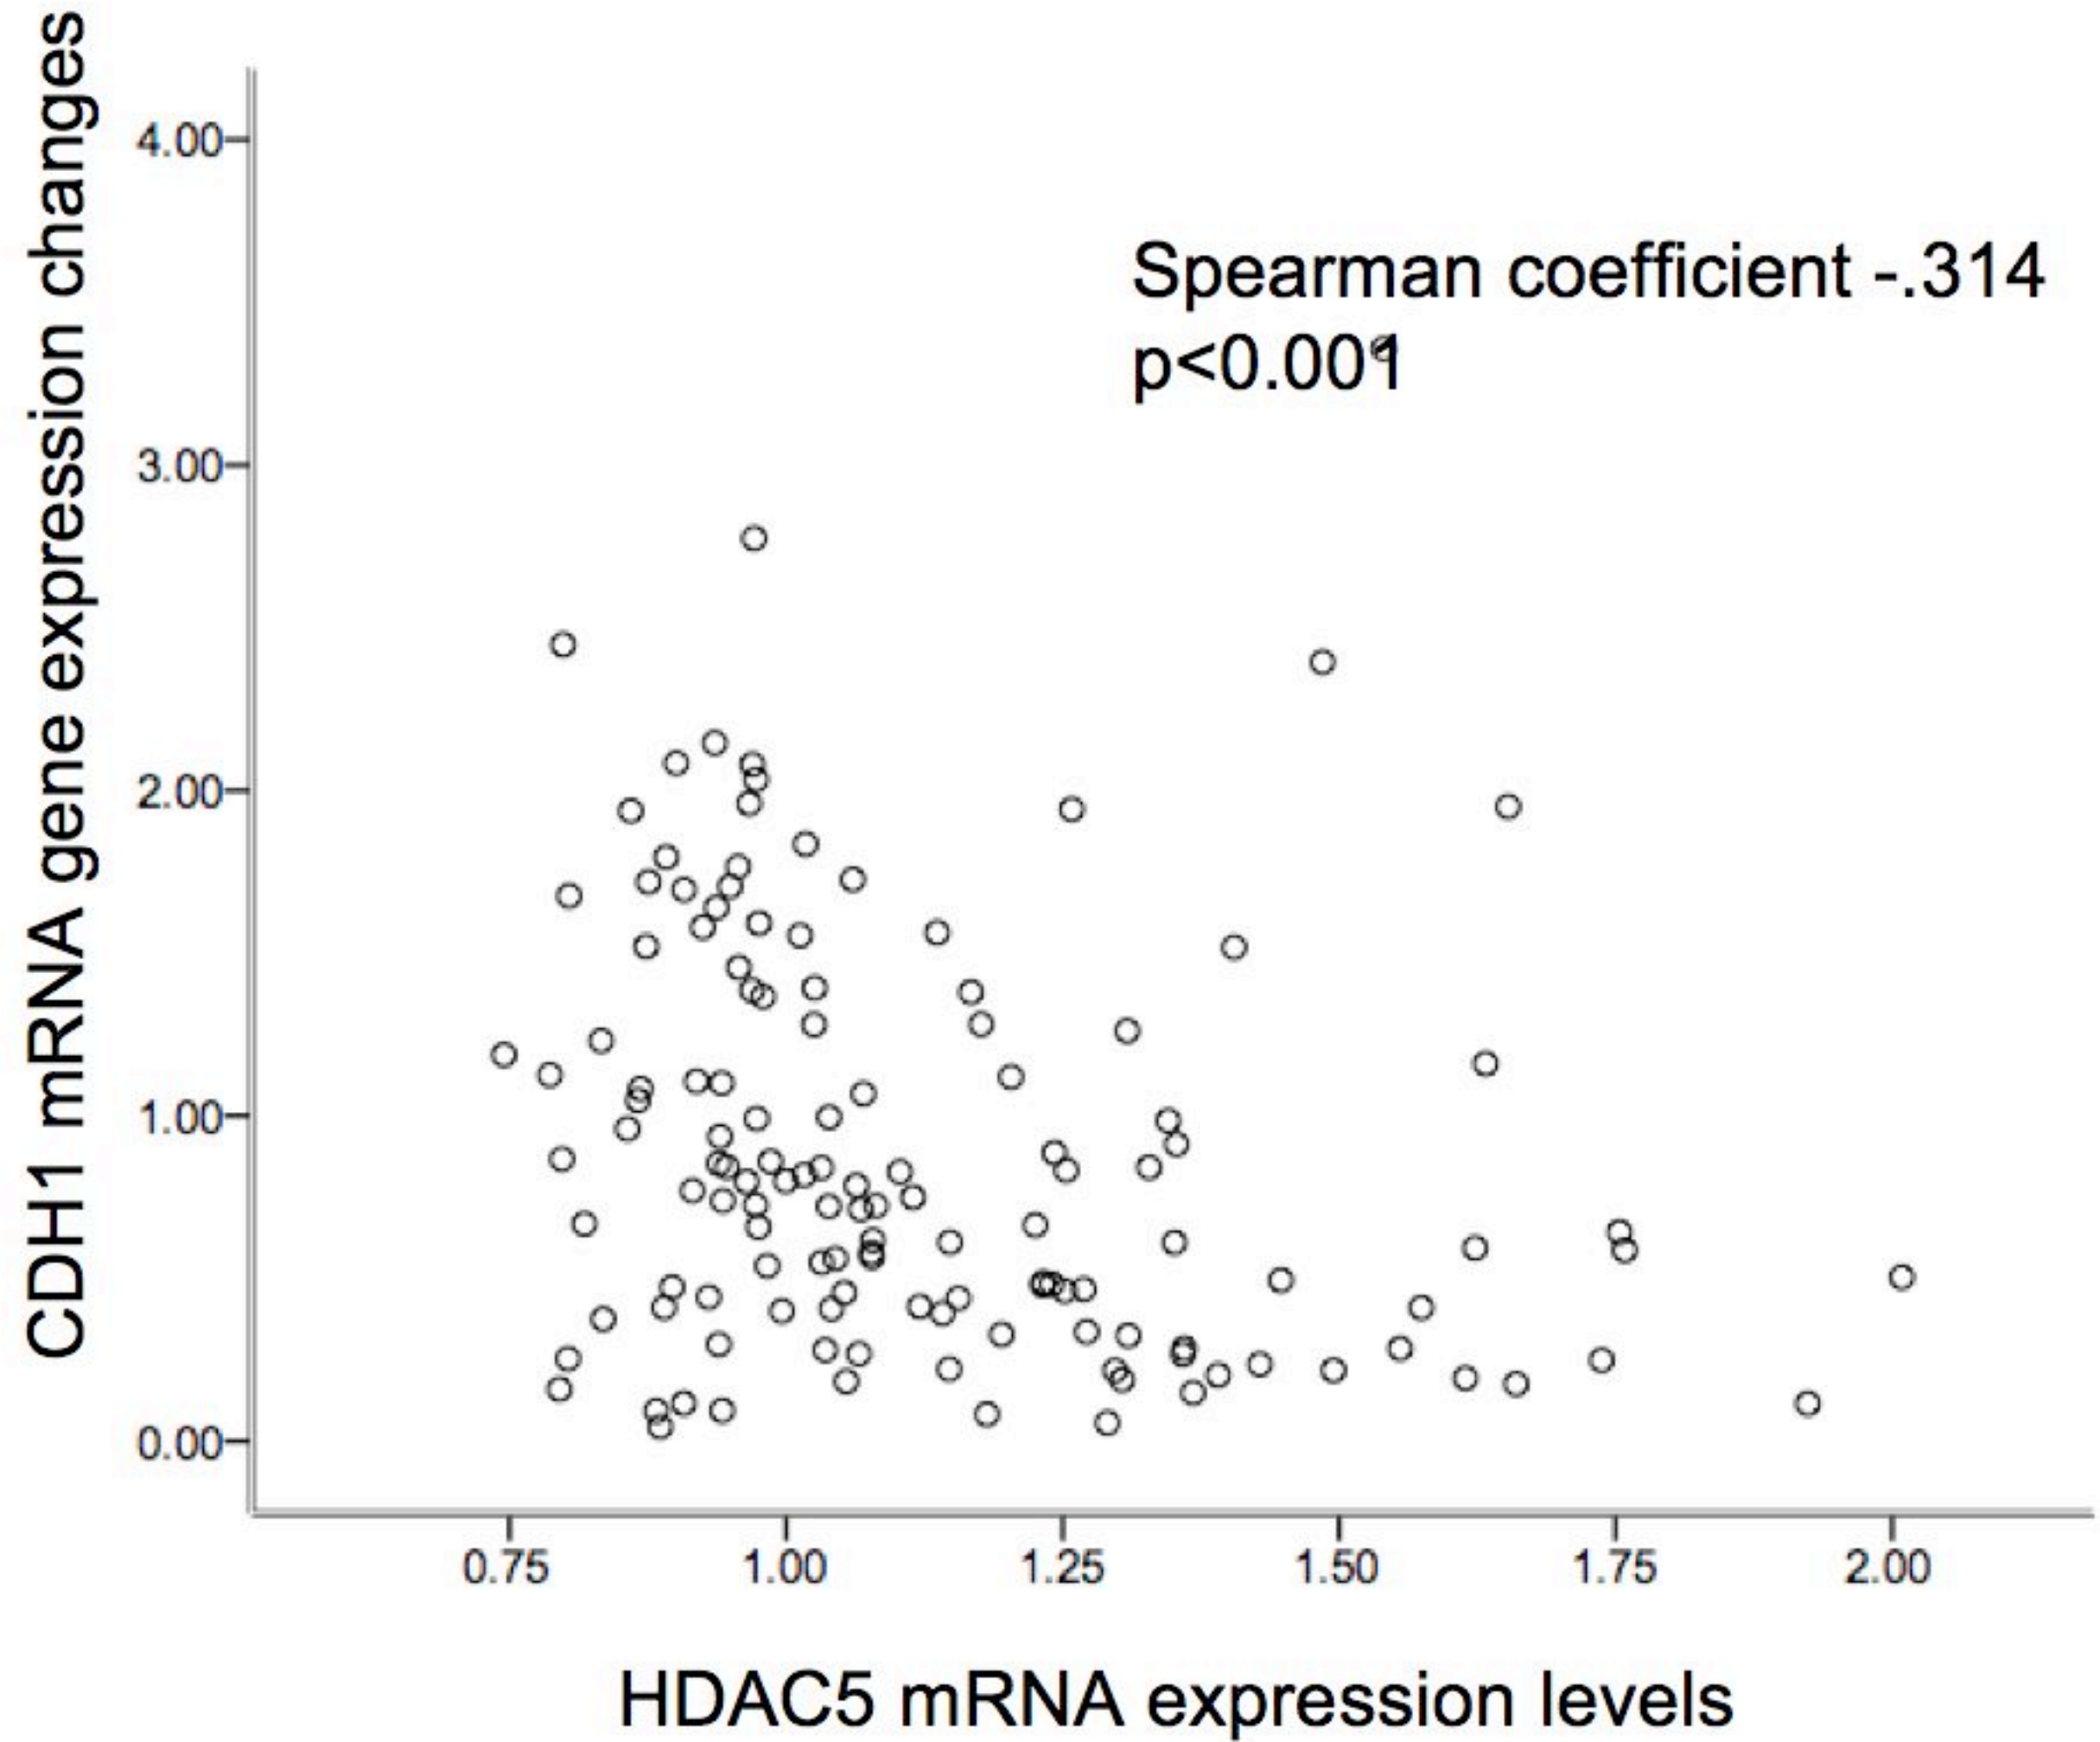

Supplement: NIHMS355139-supplement-05.pdf [file NIHMS355139-supplement-05.pdf]

A

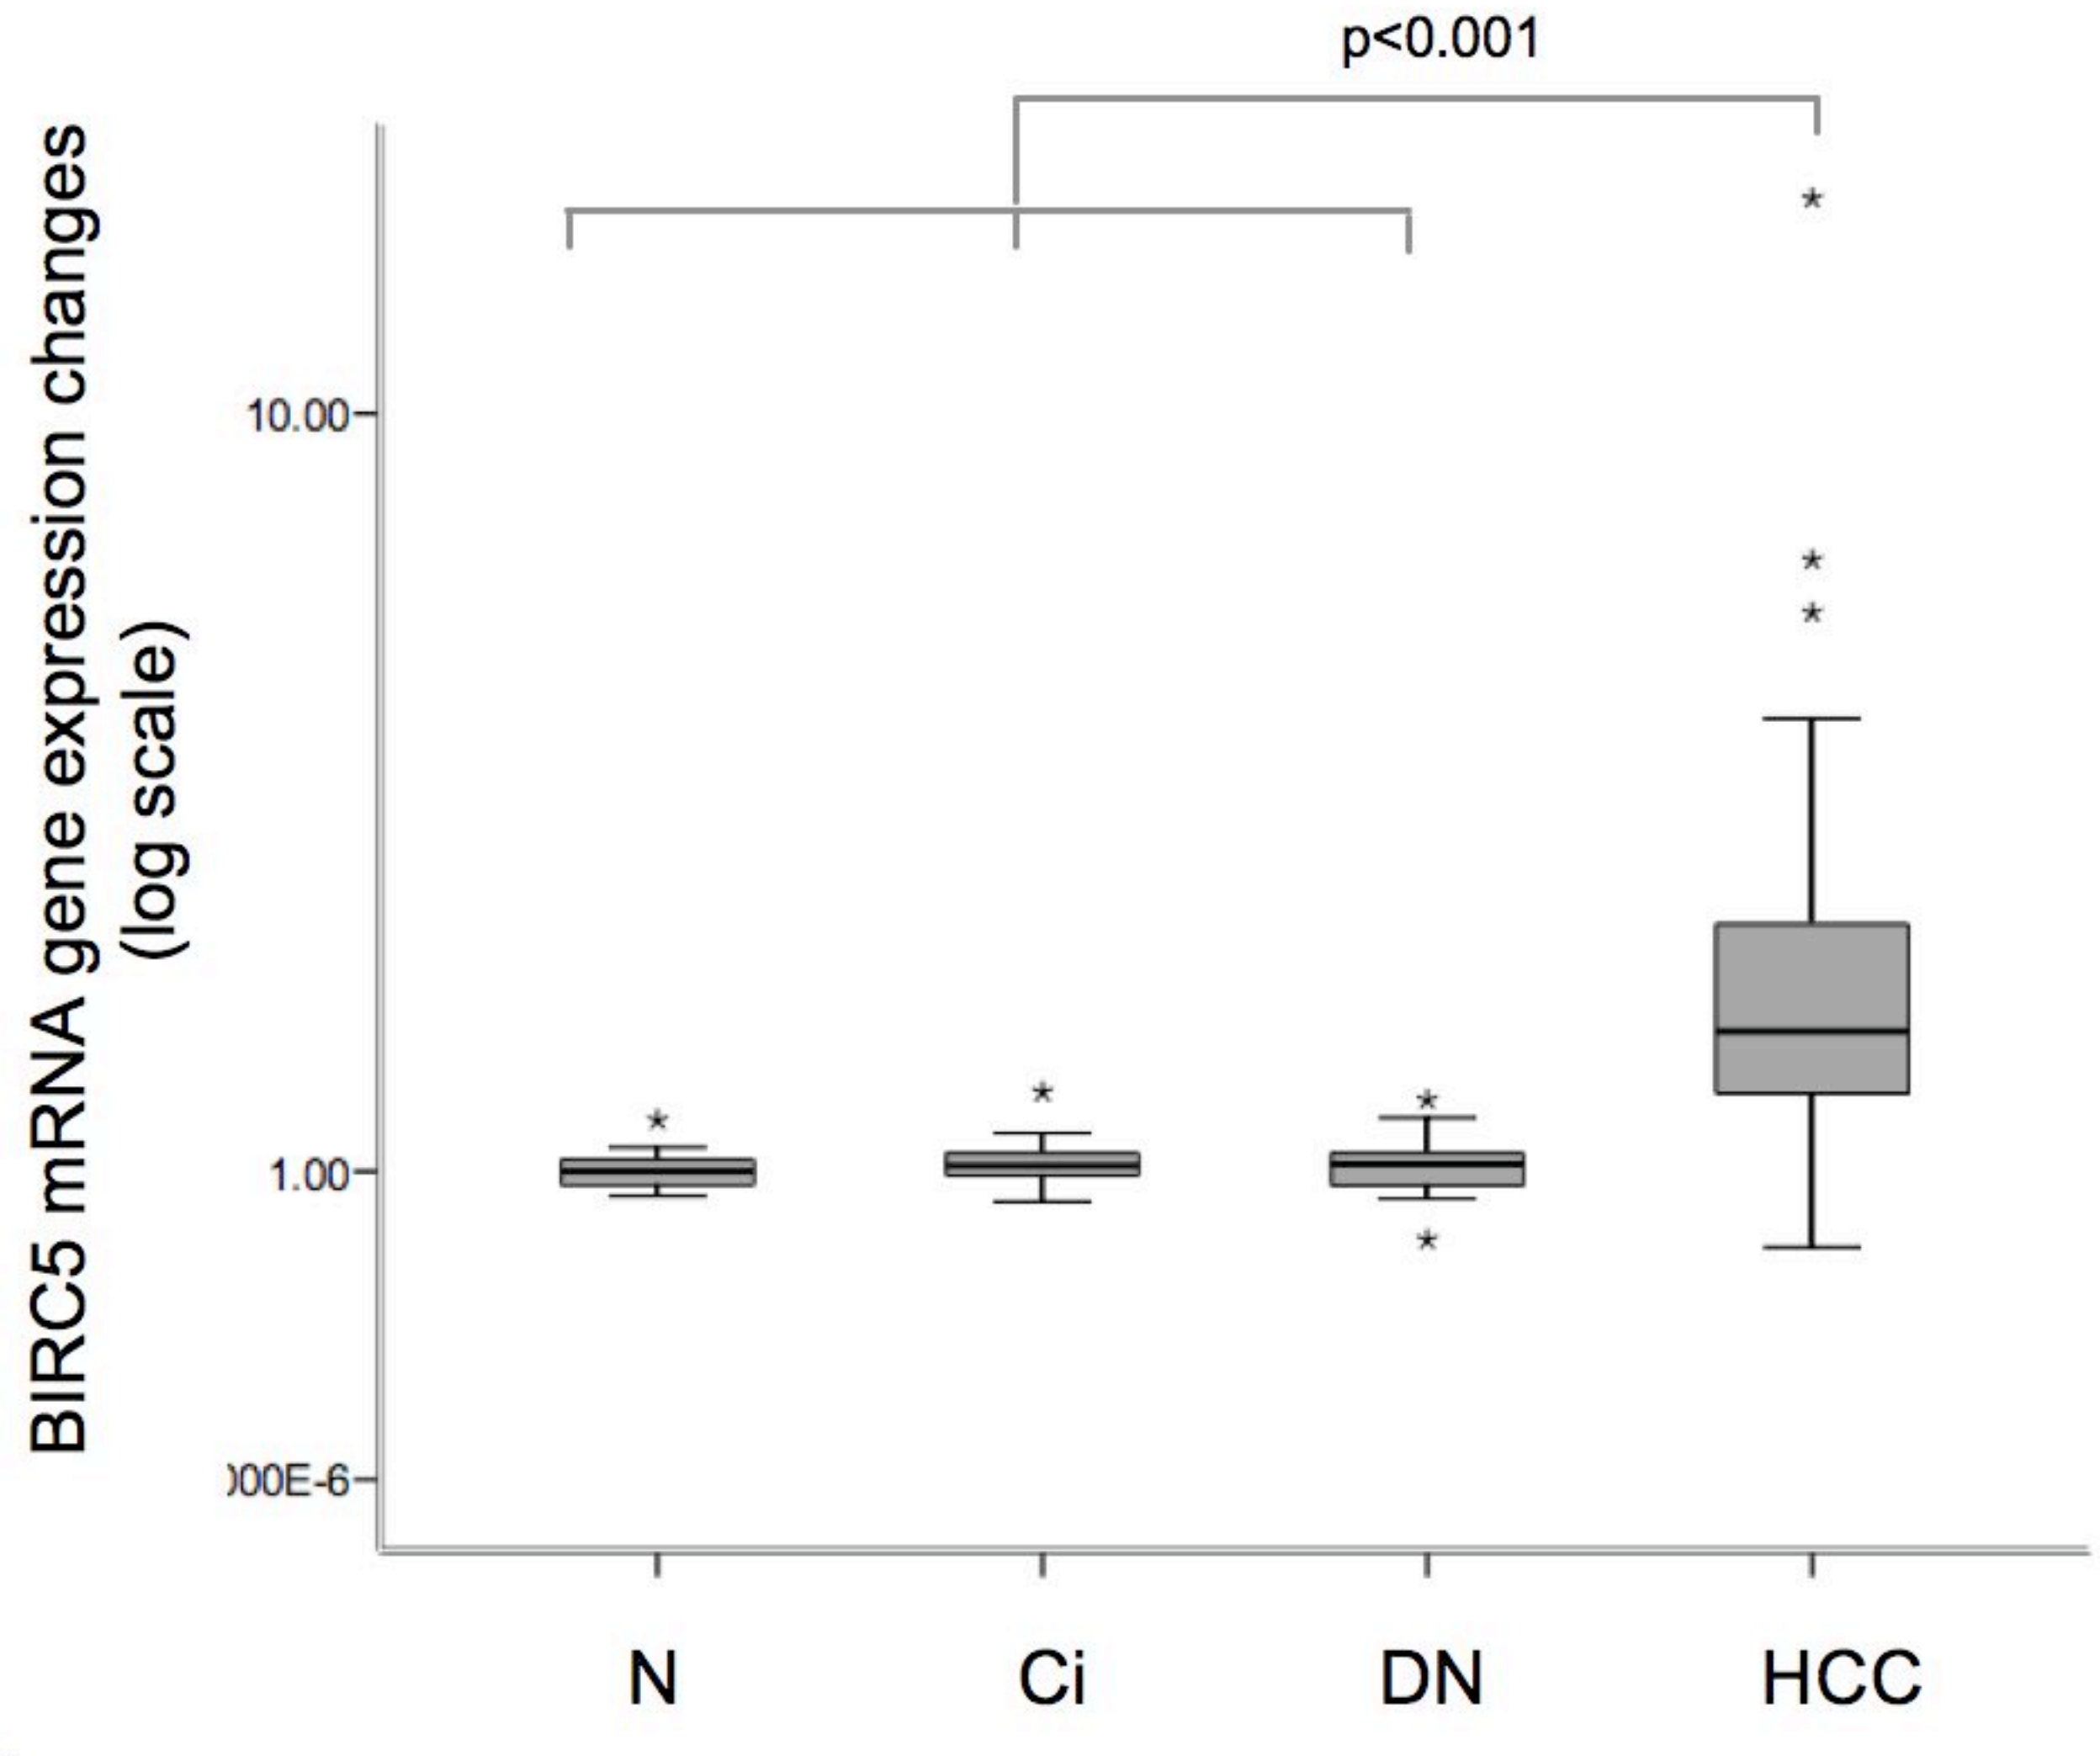

B

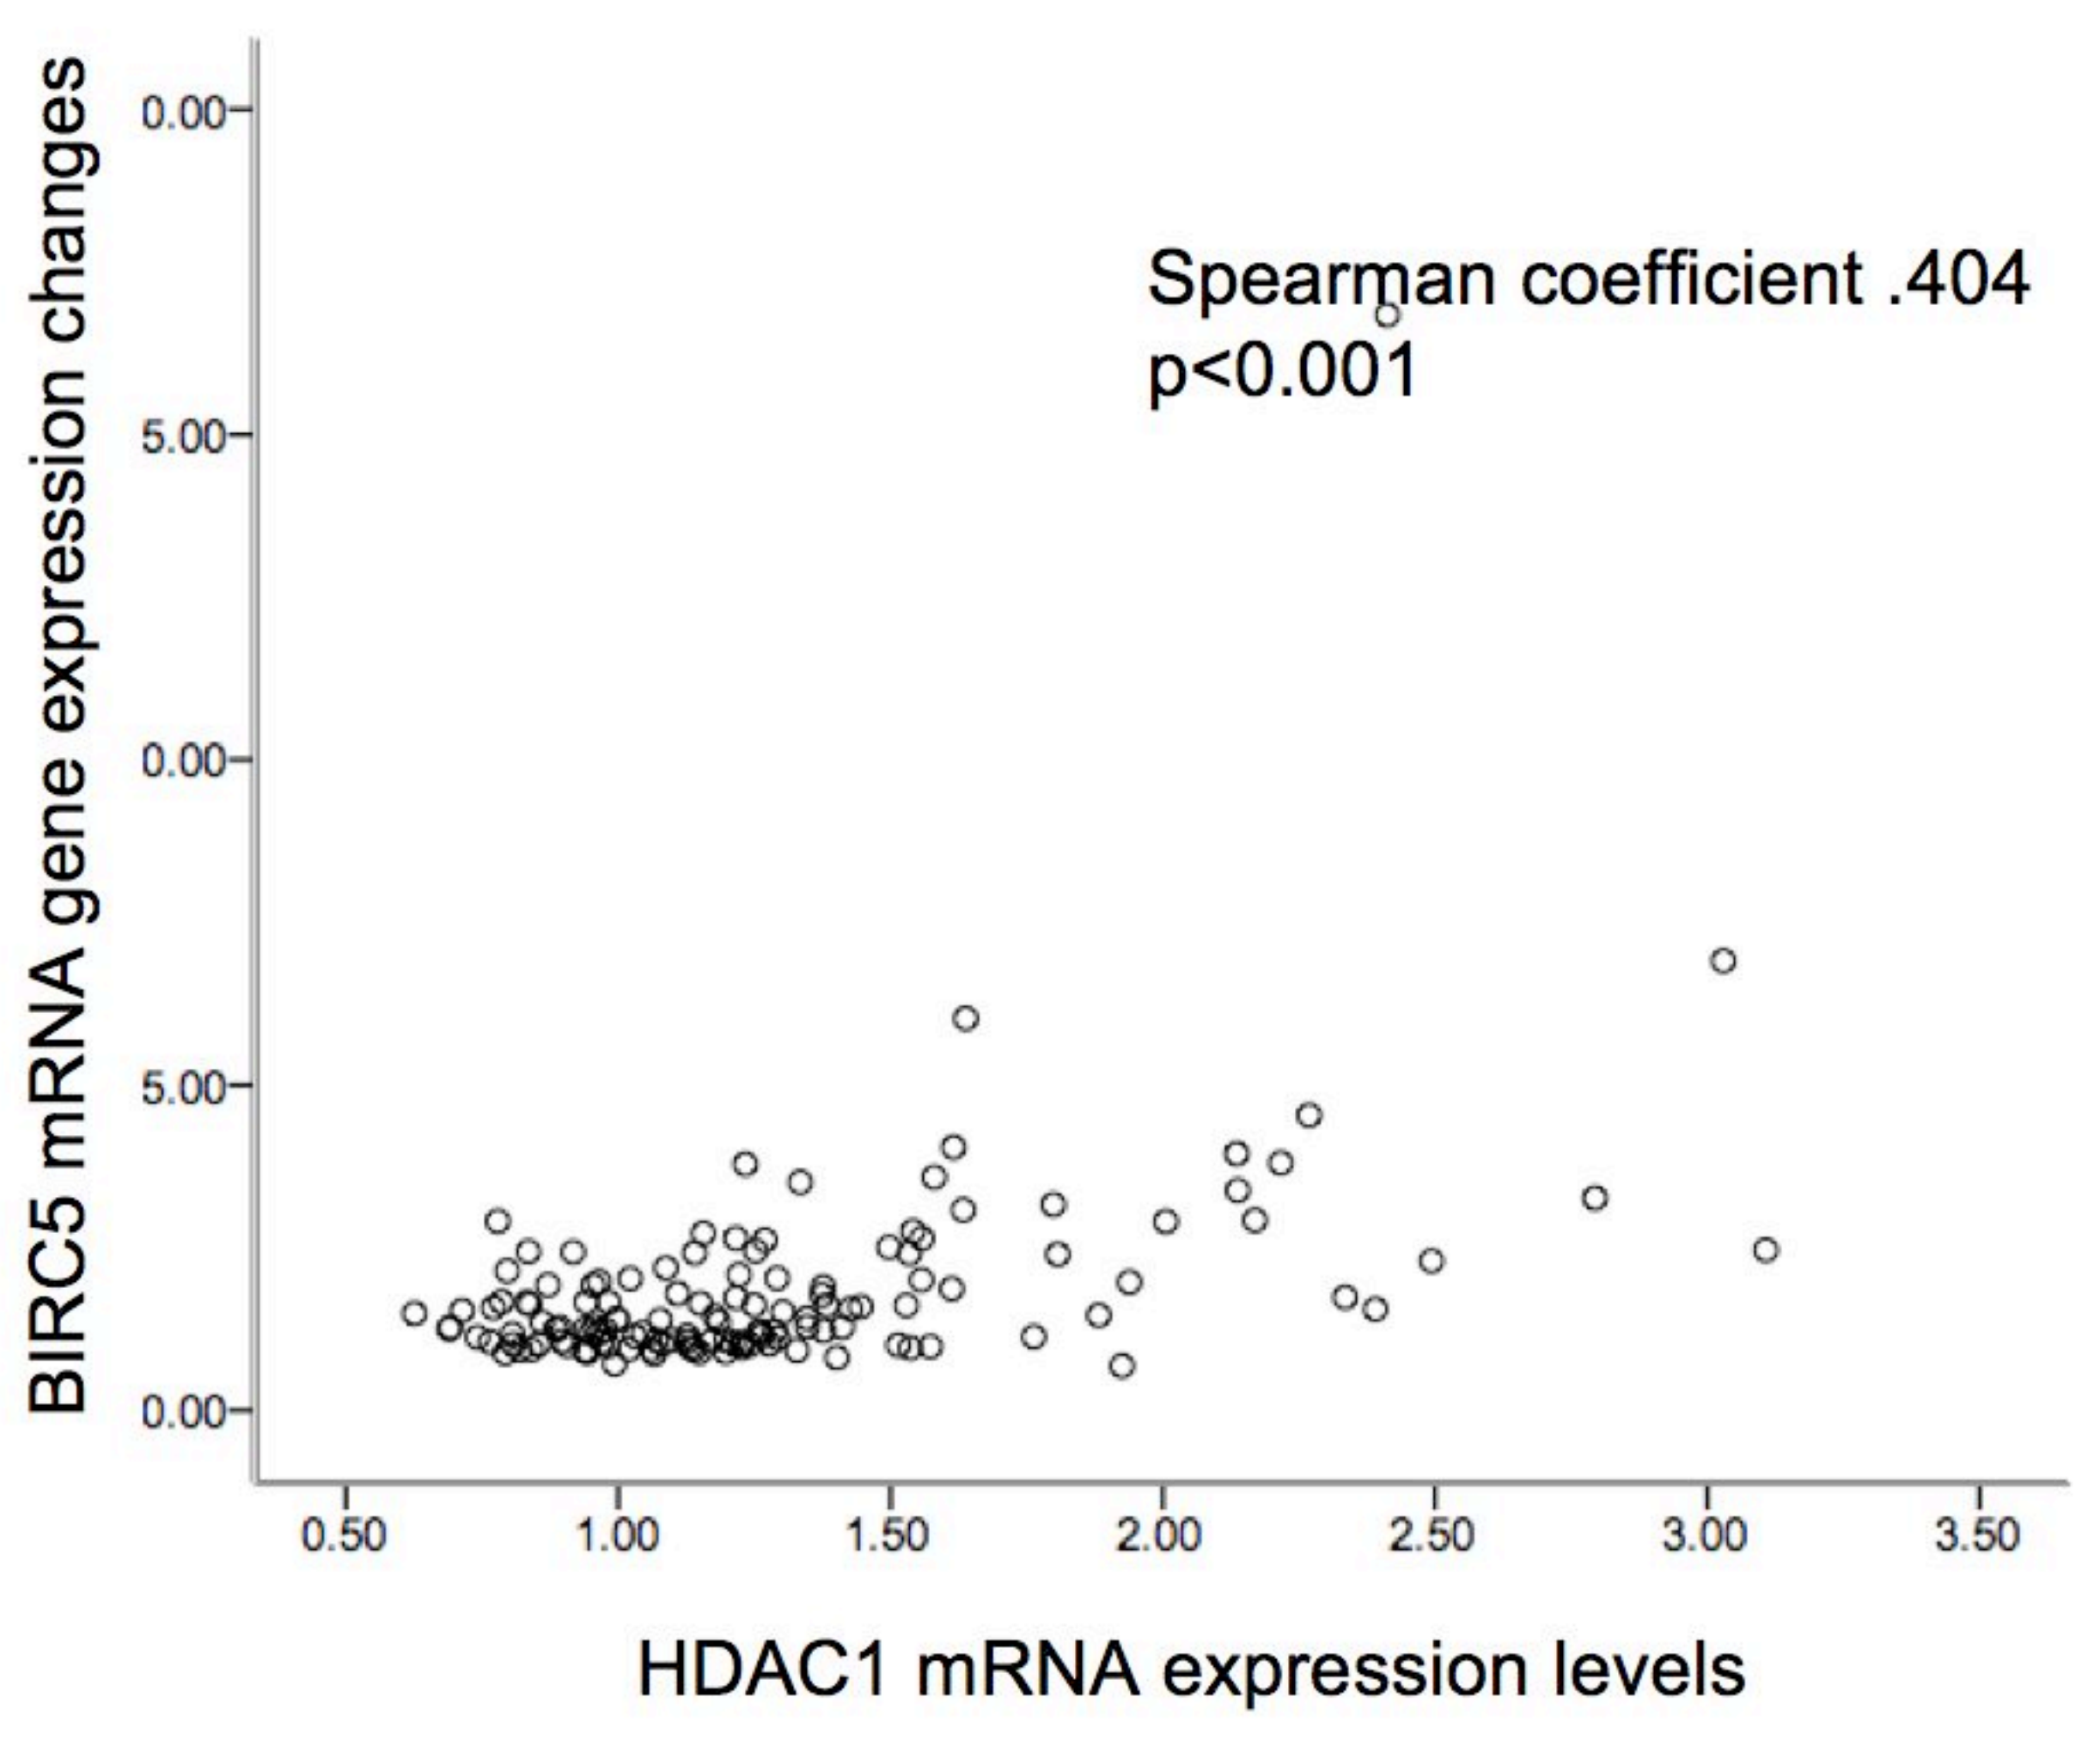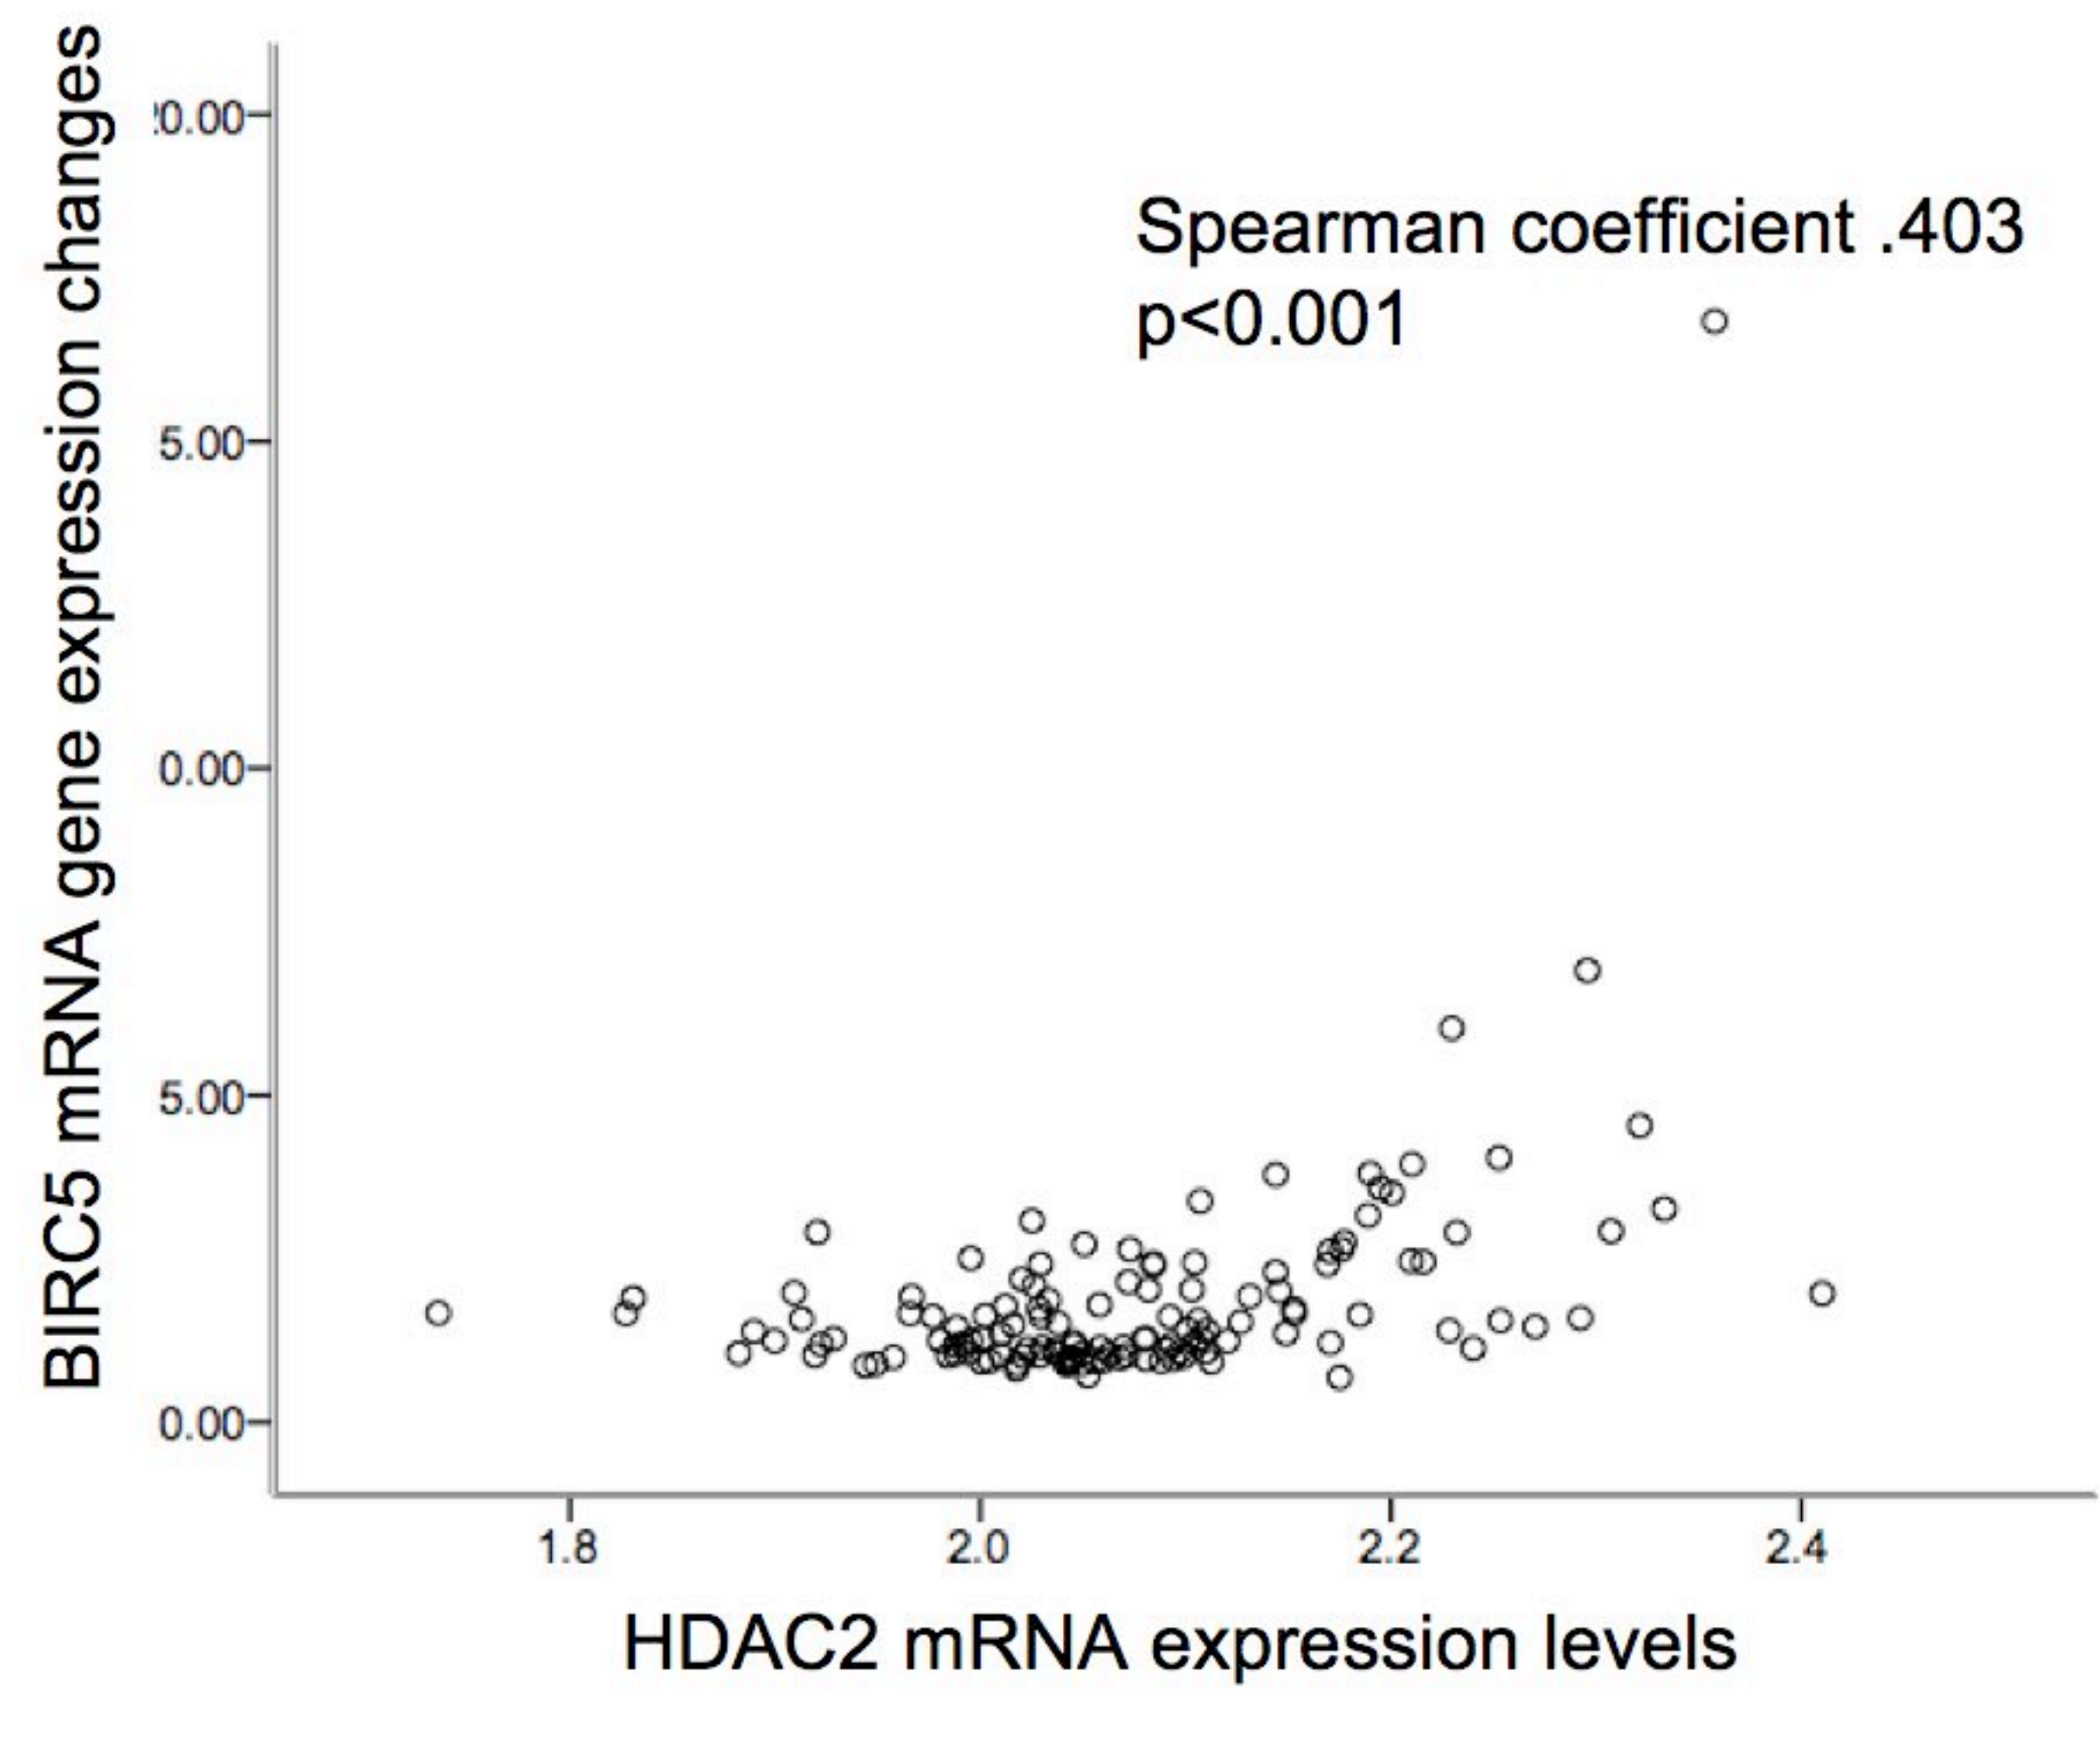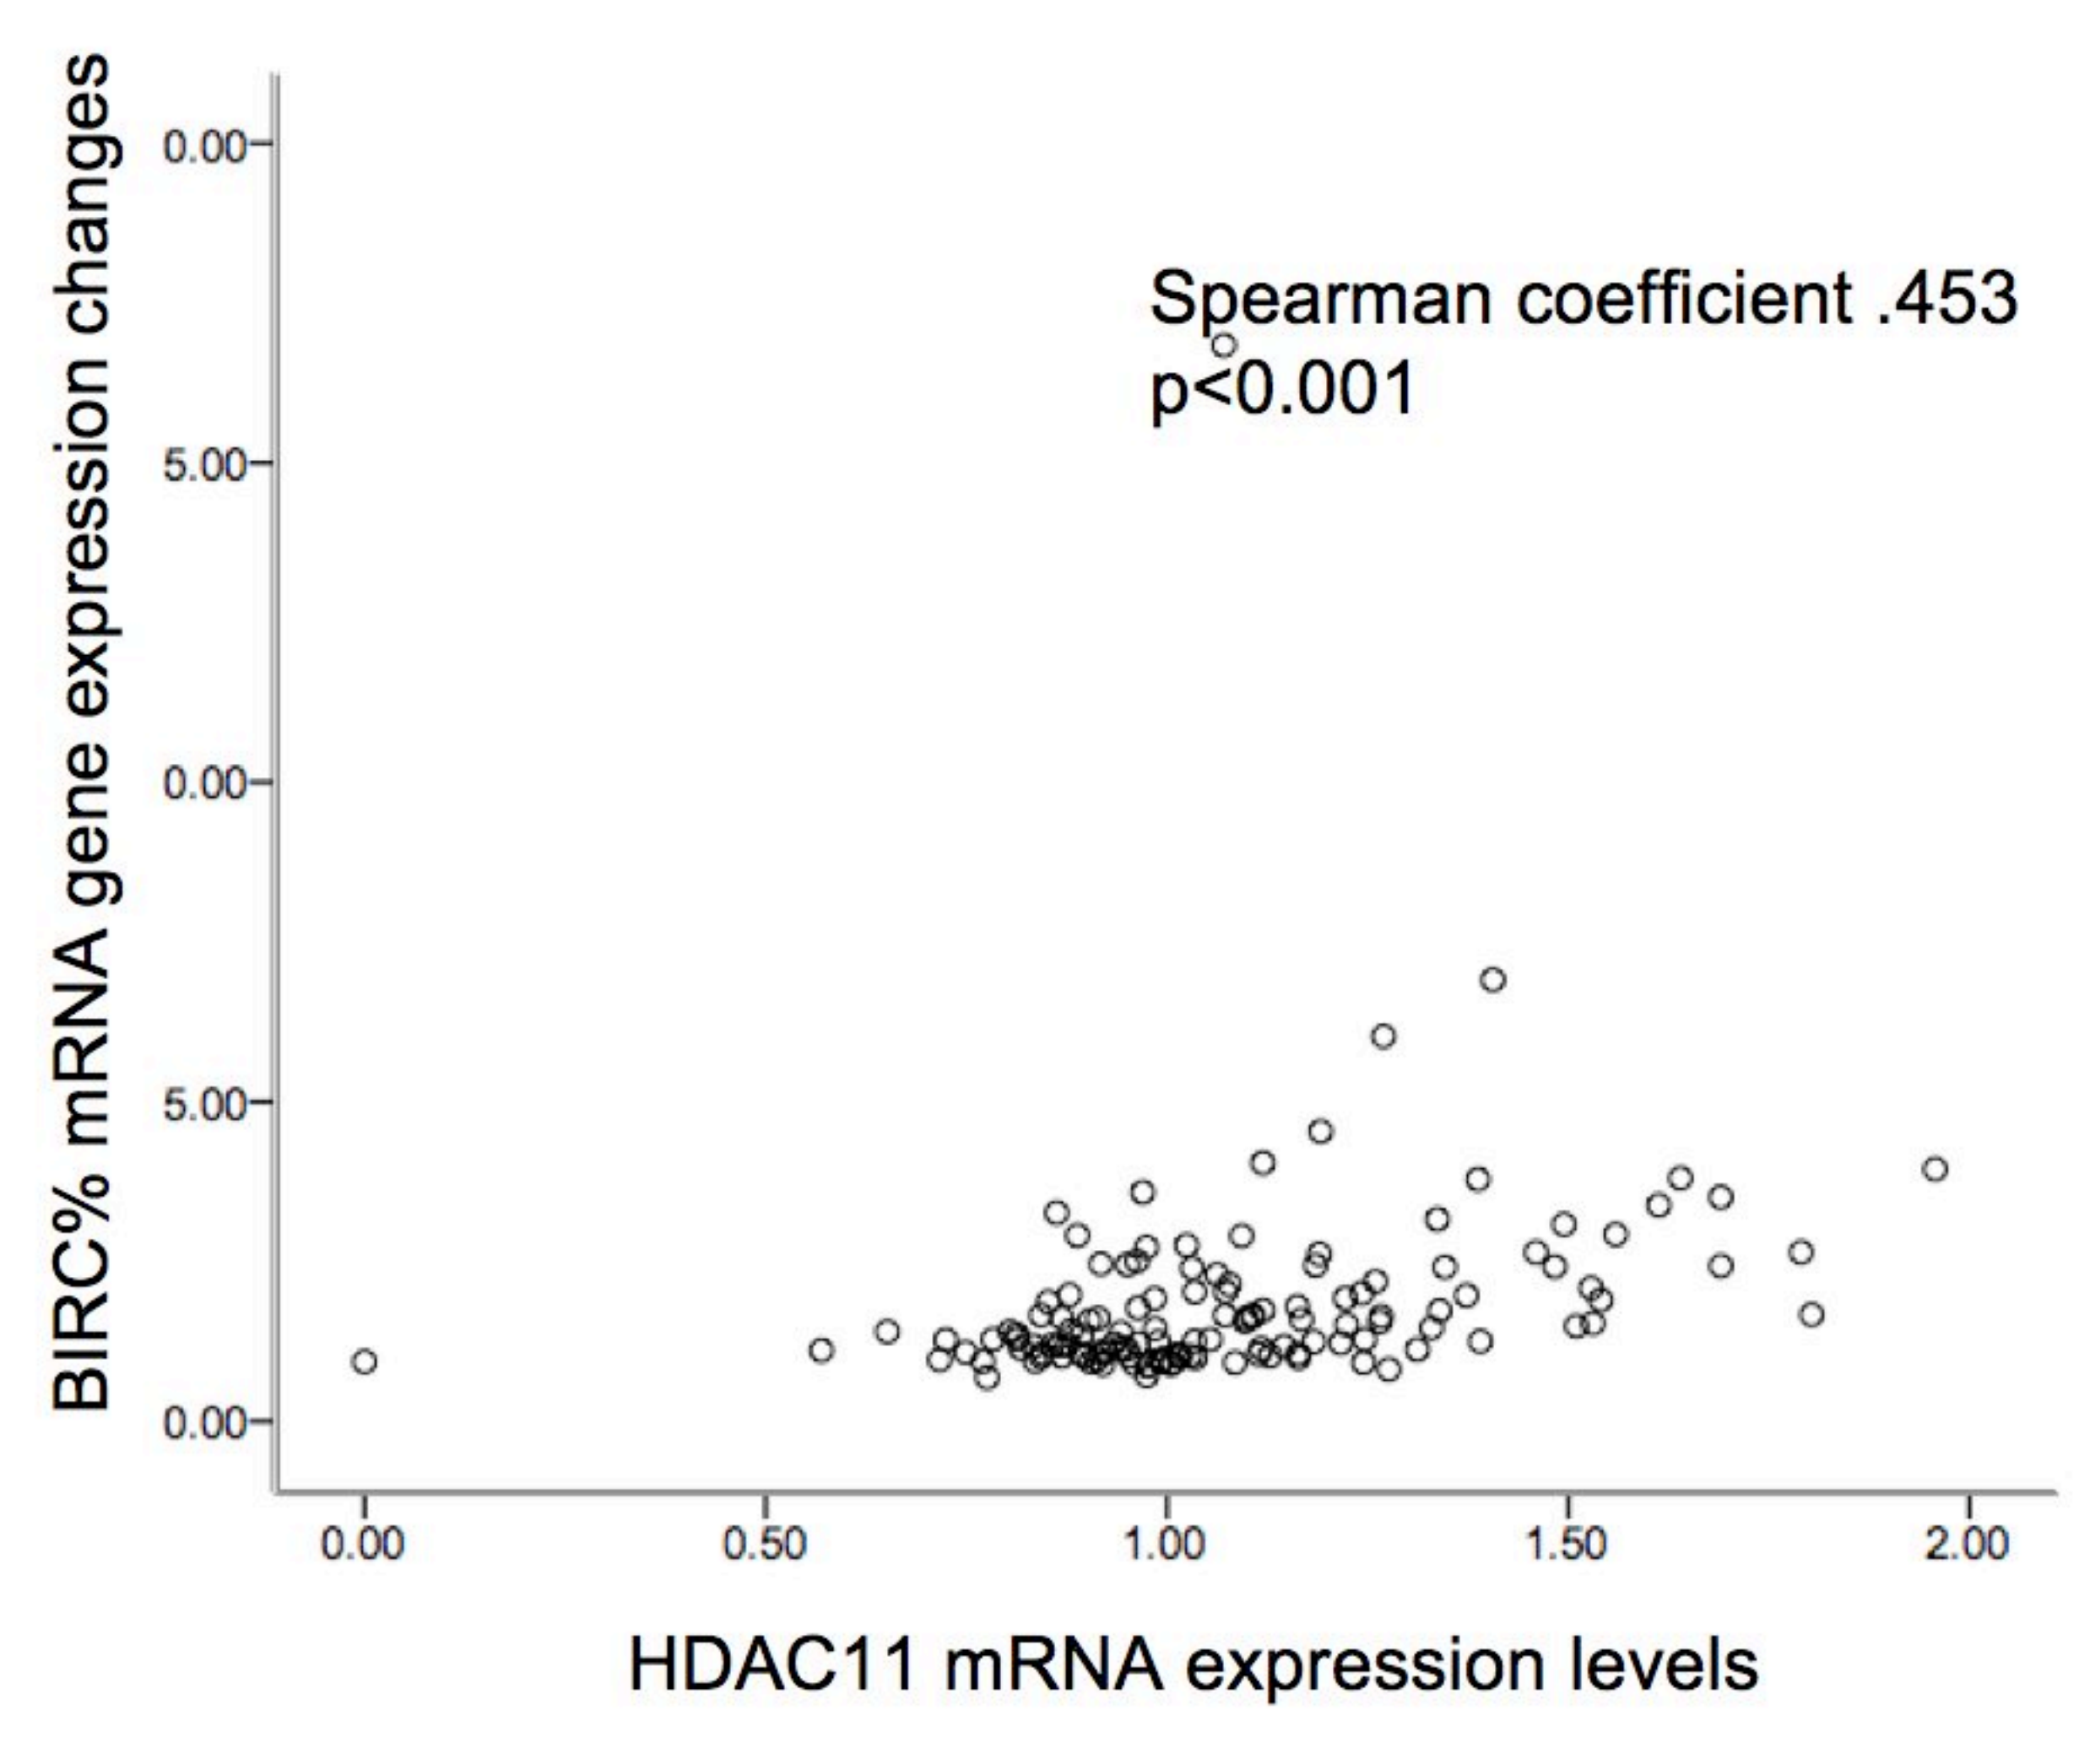

Supplement: NIHMS355139-supplement-06.pdf [file NIHMS355139-supplement-06.pdf]

Suppl. Fig. 4

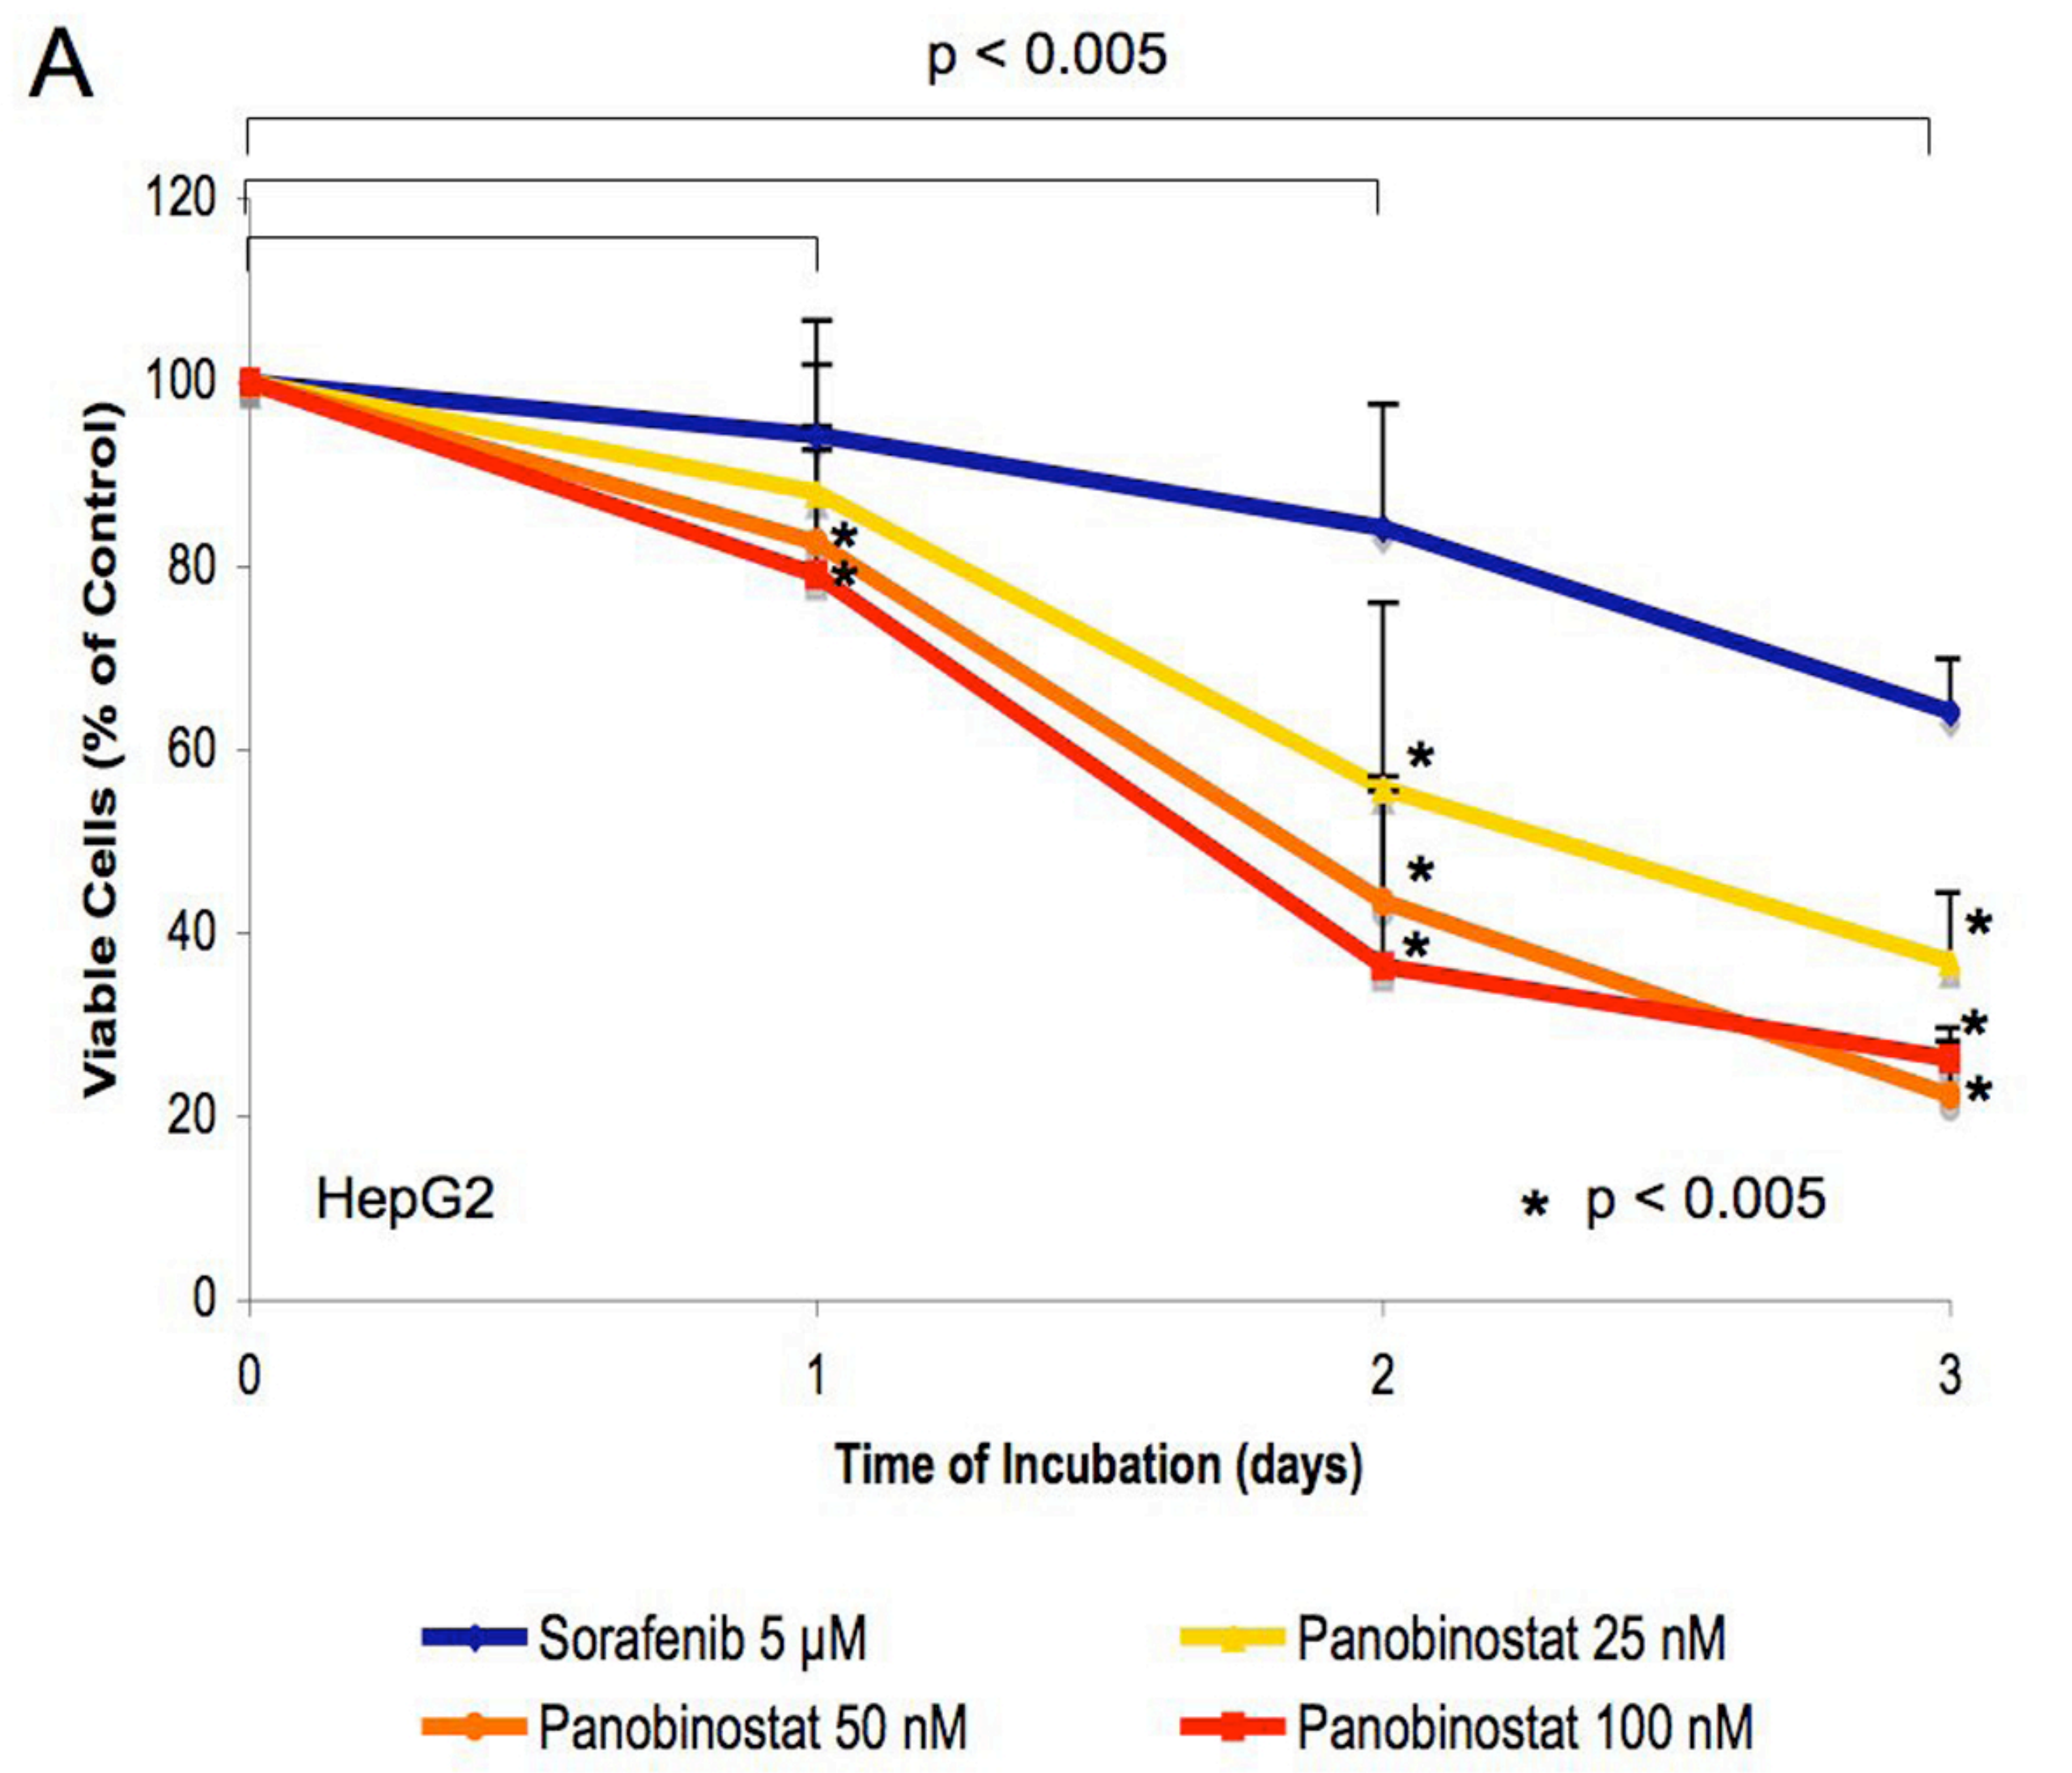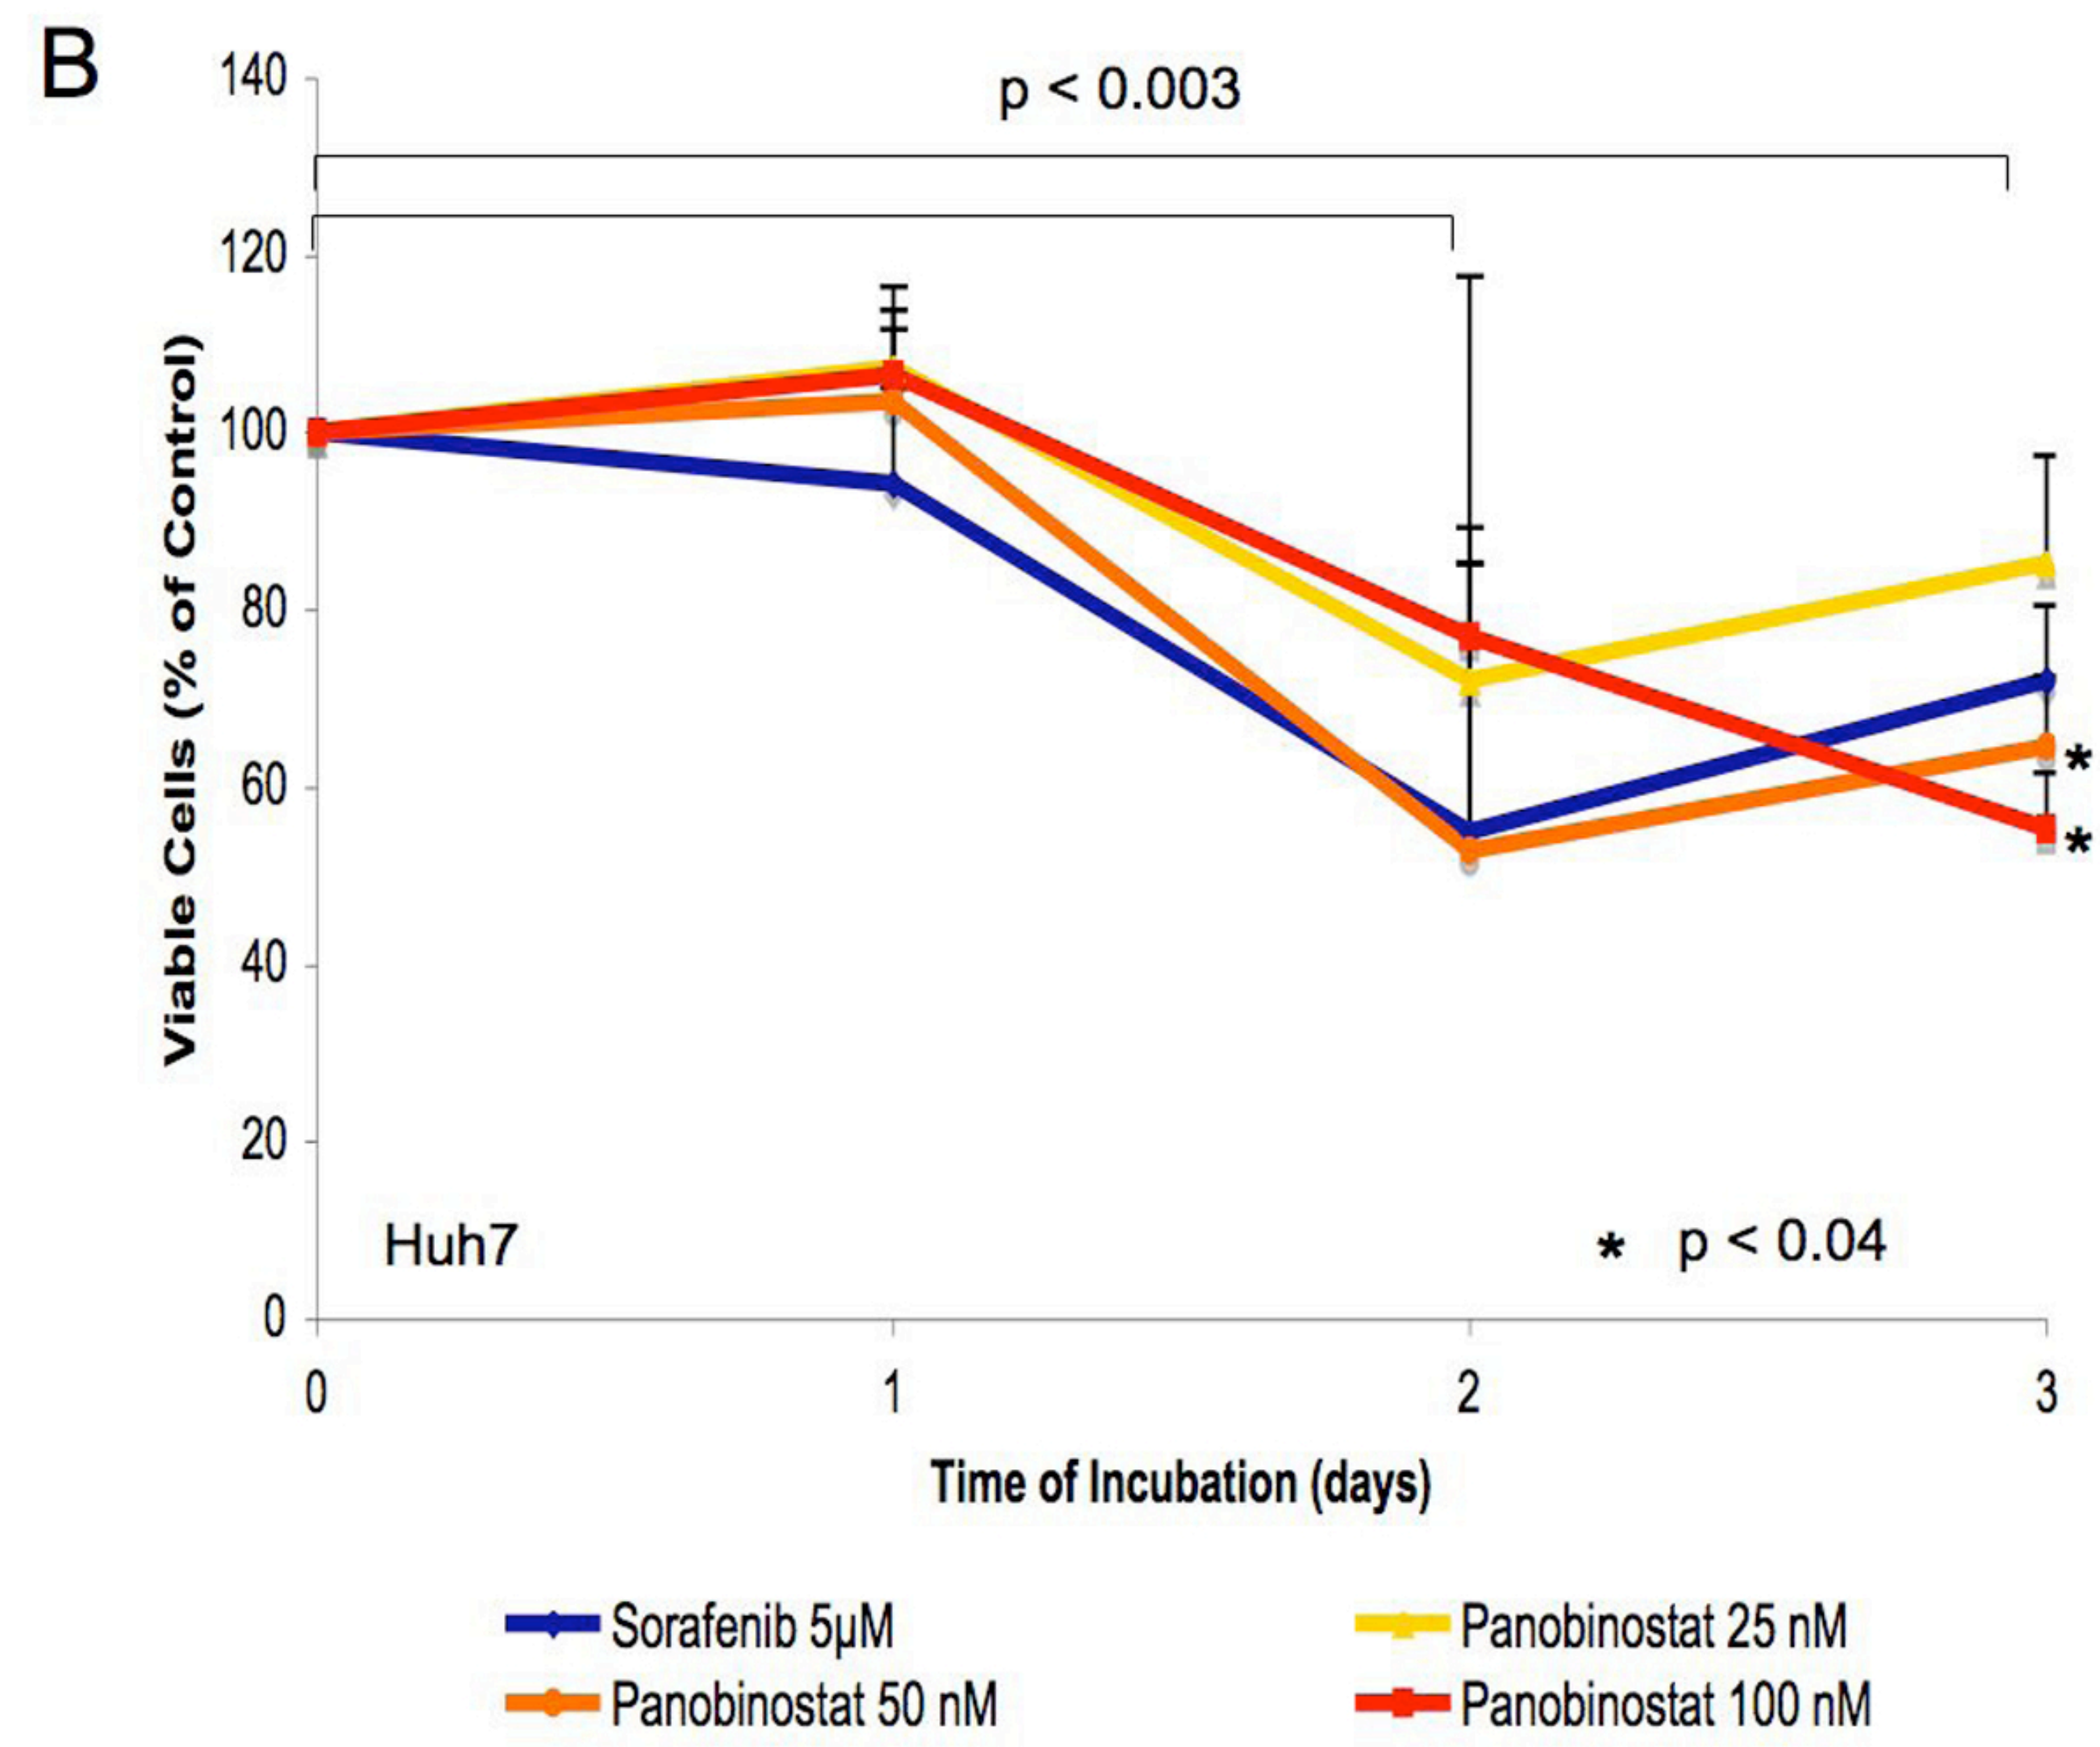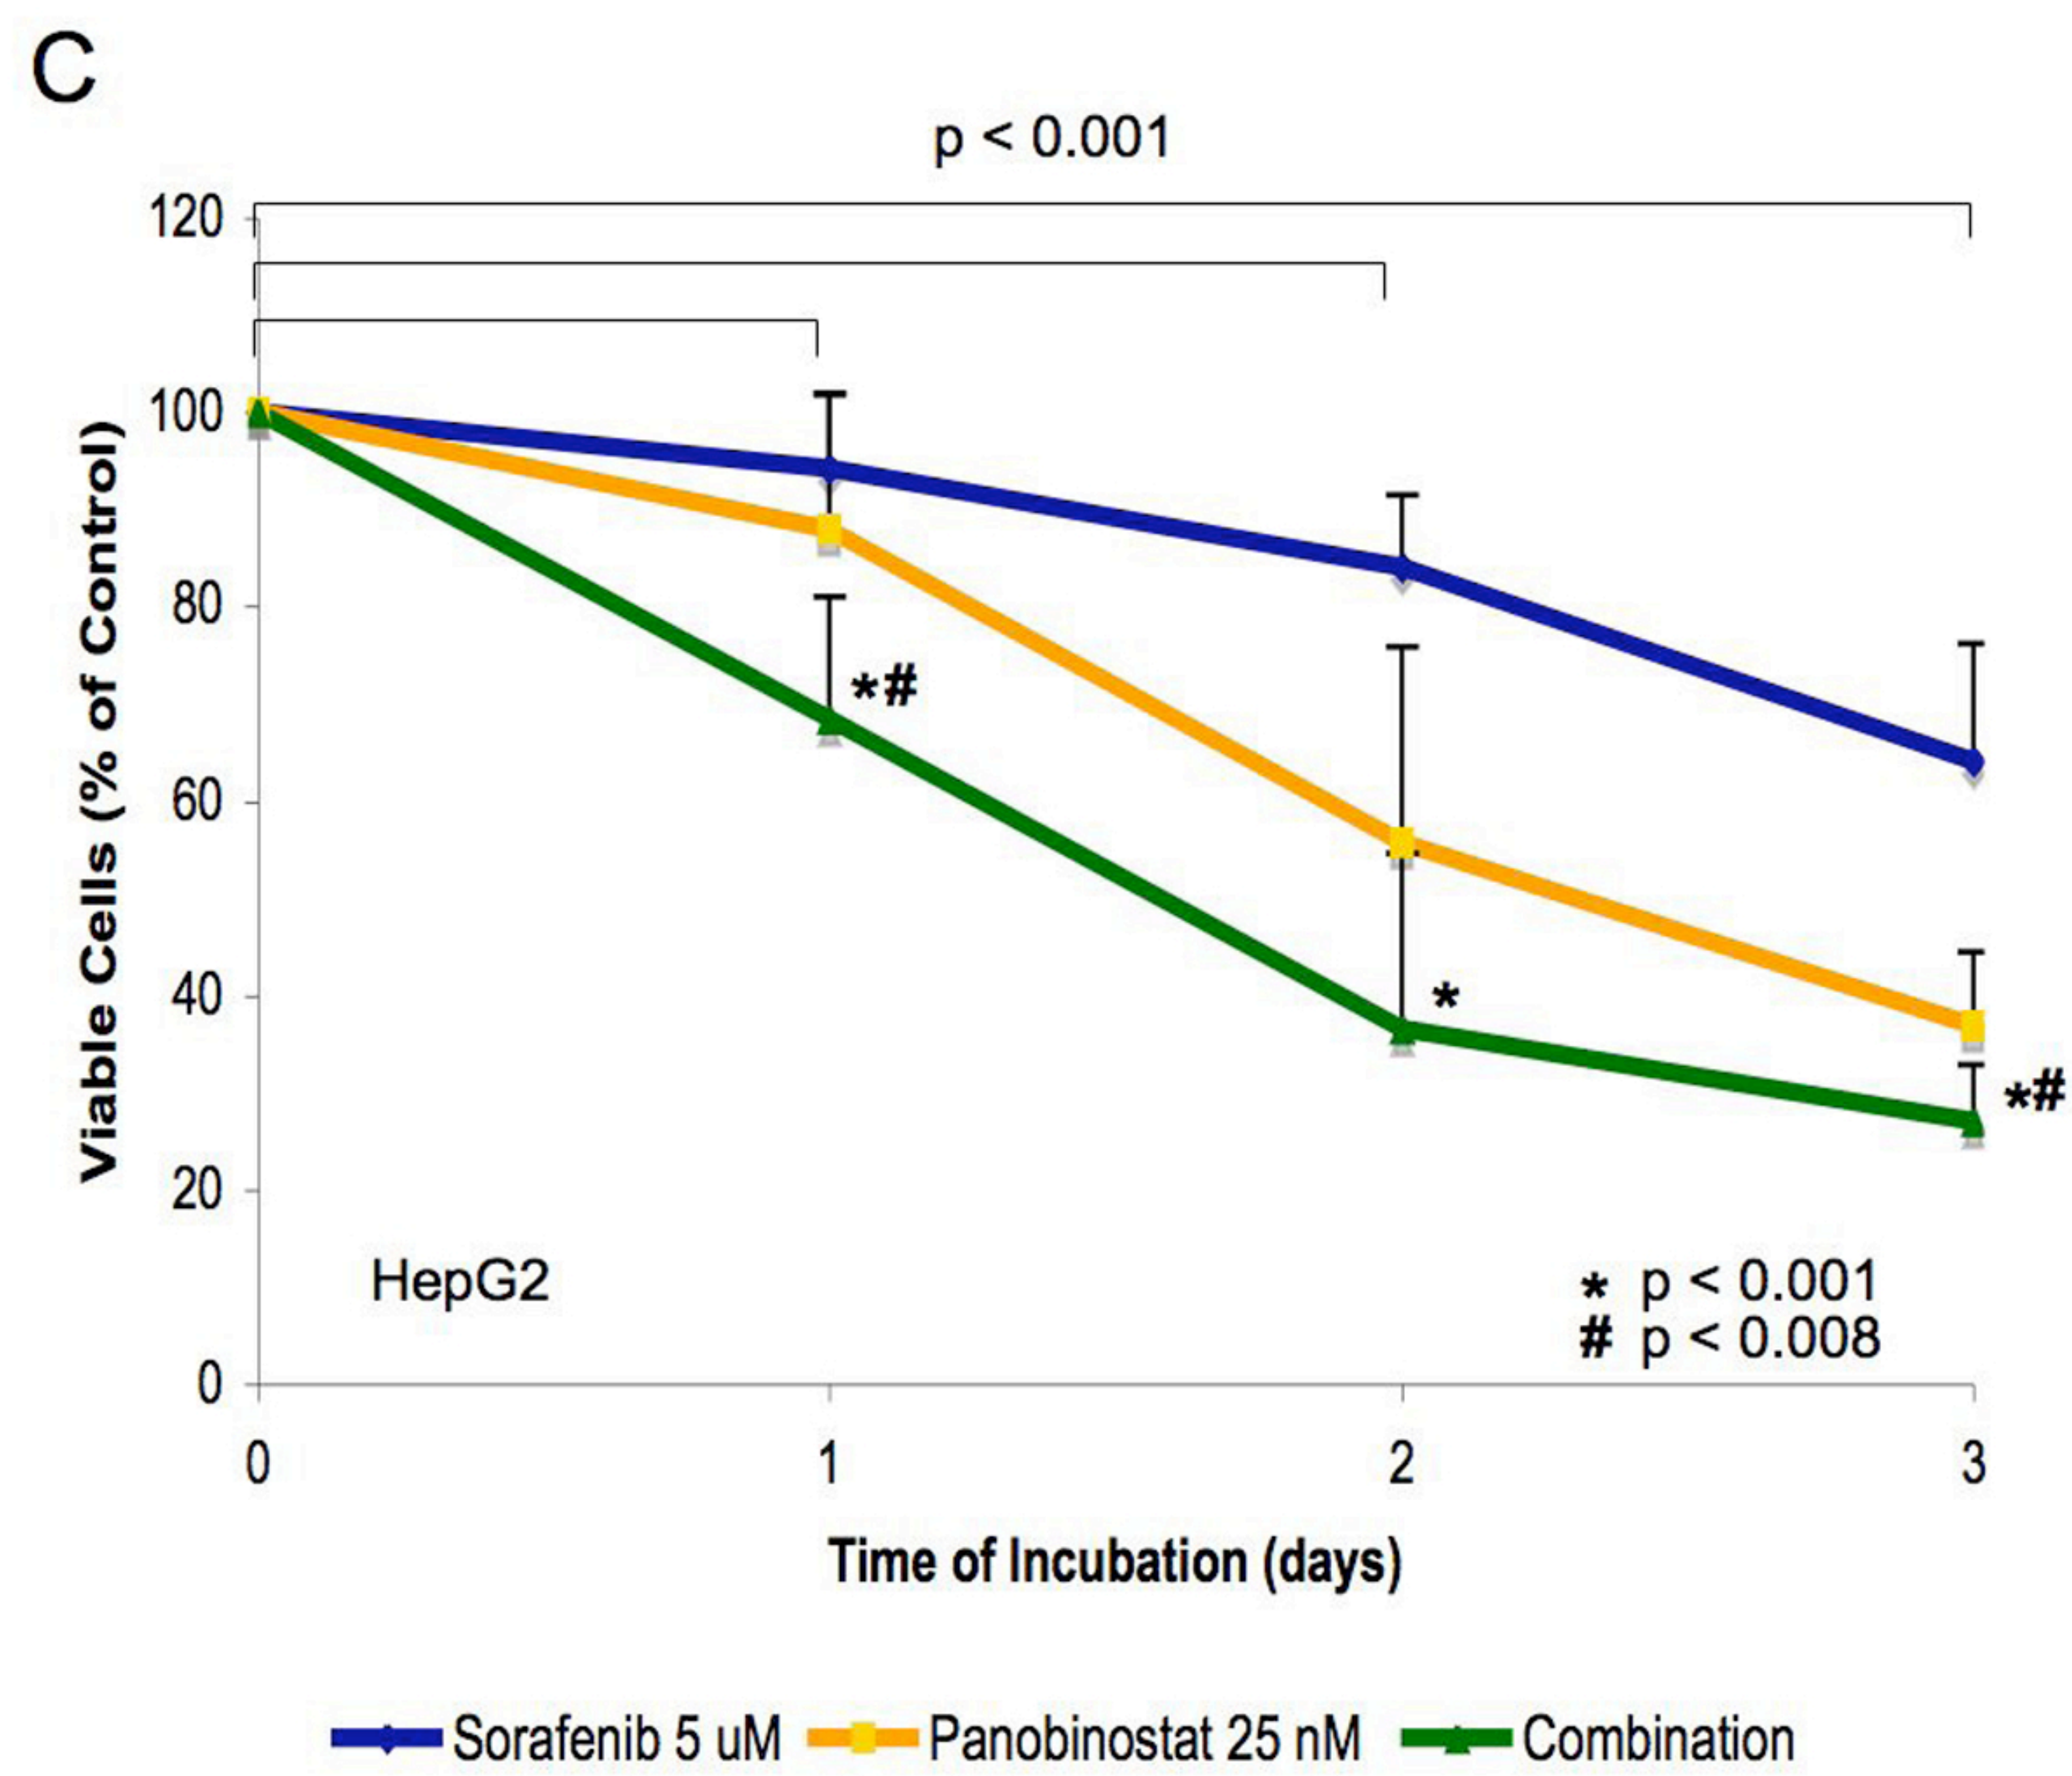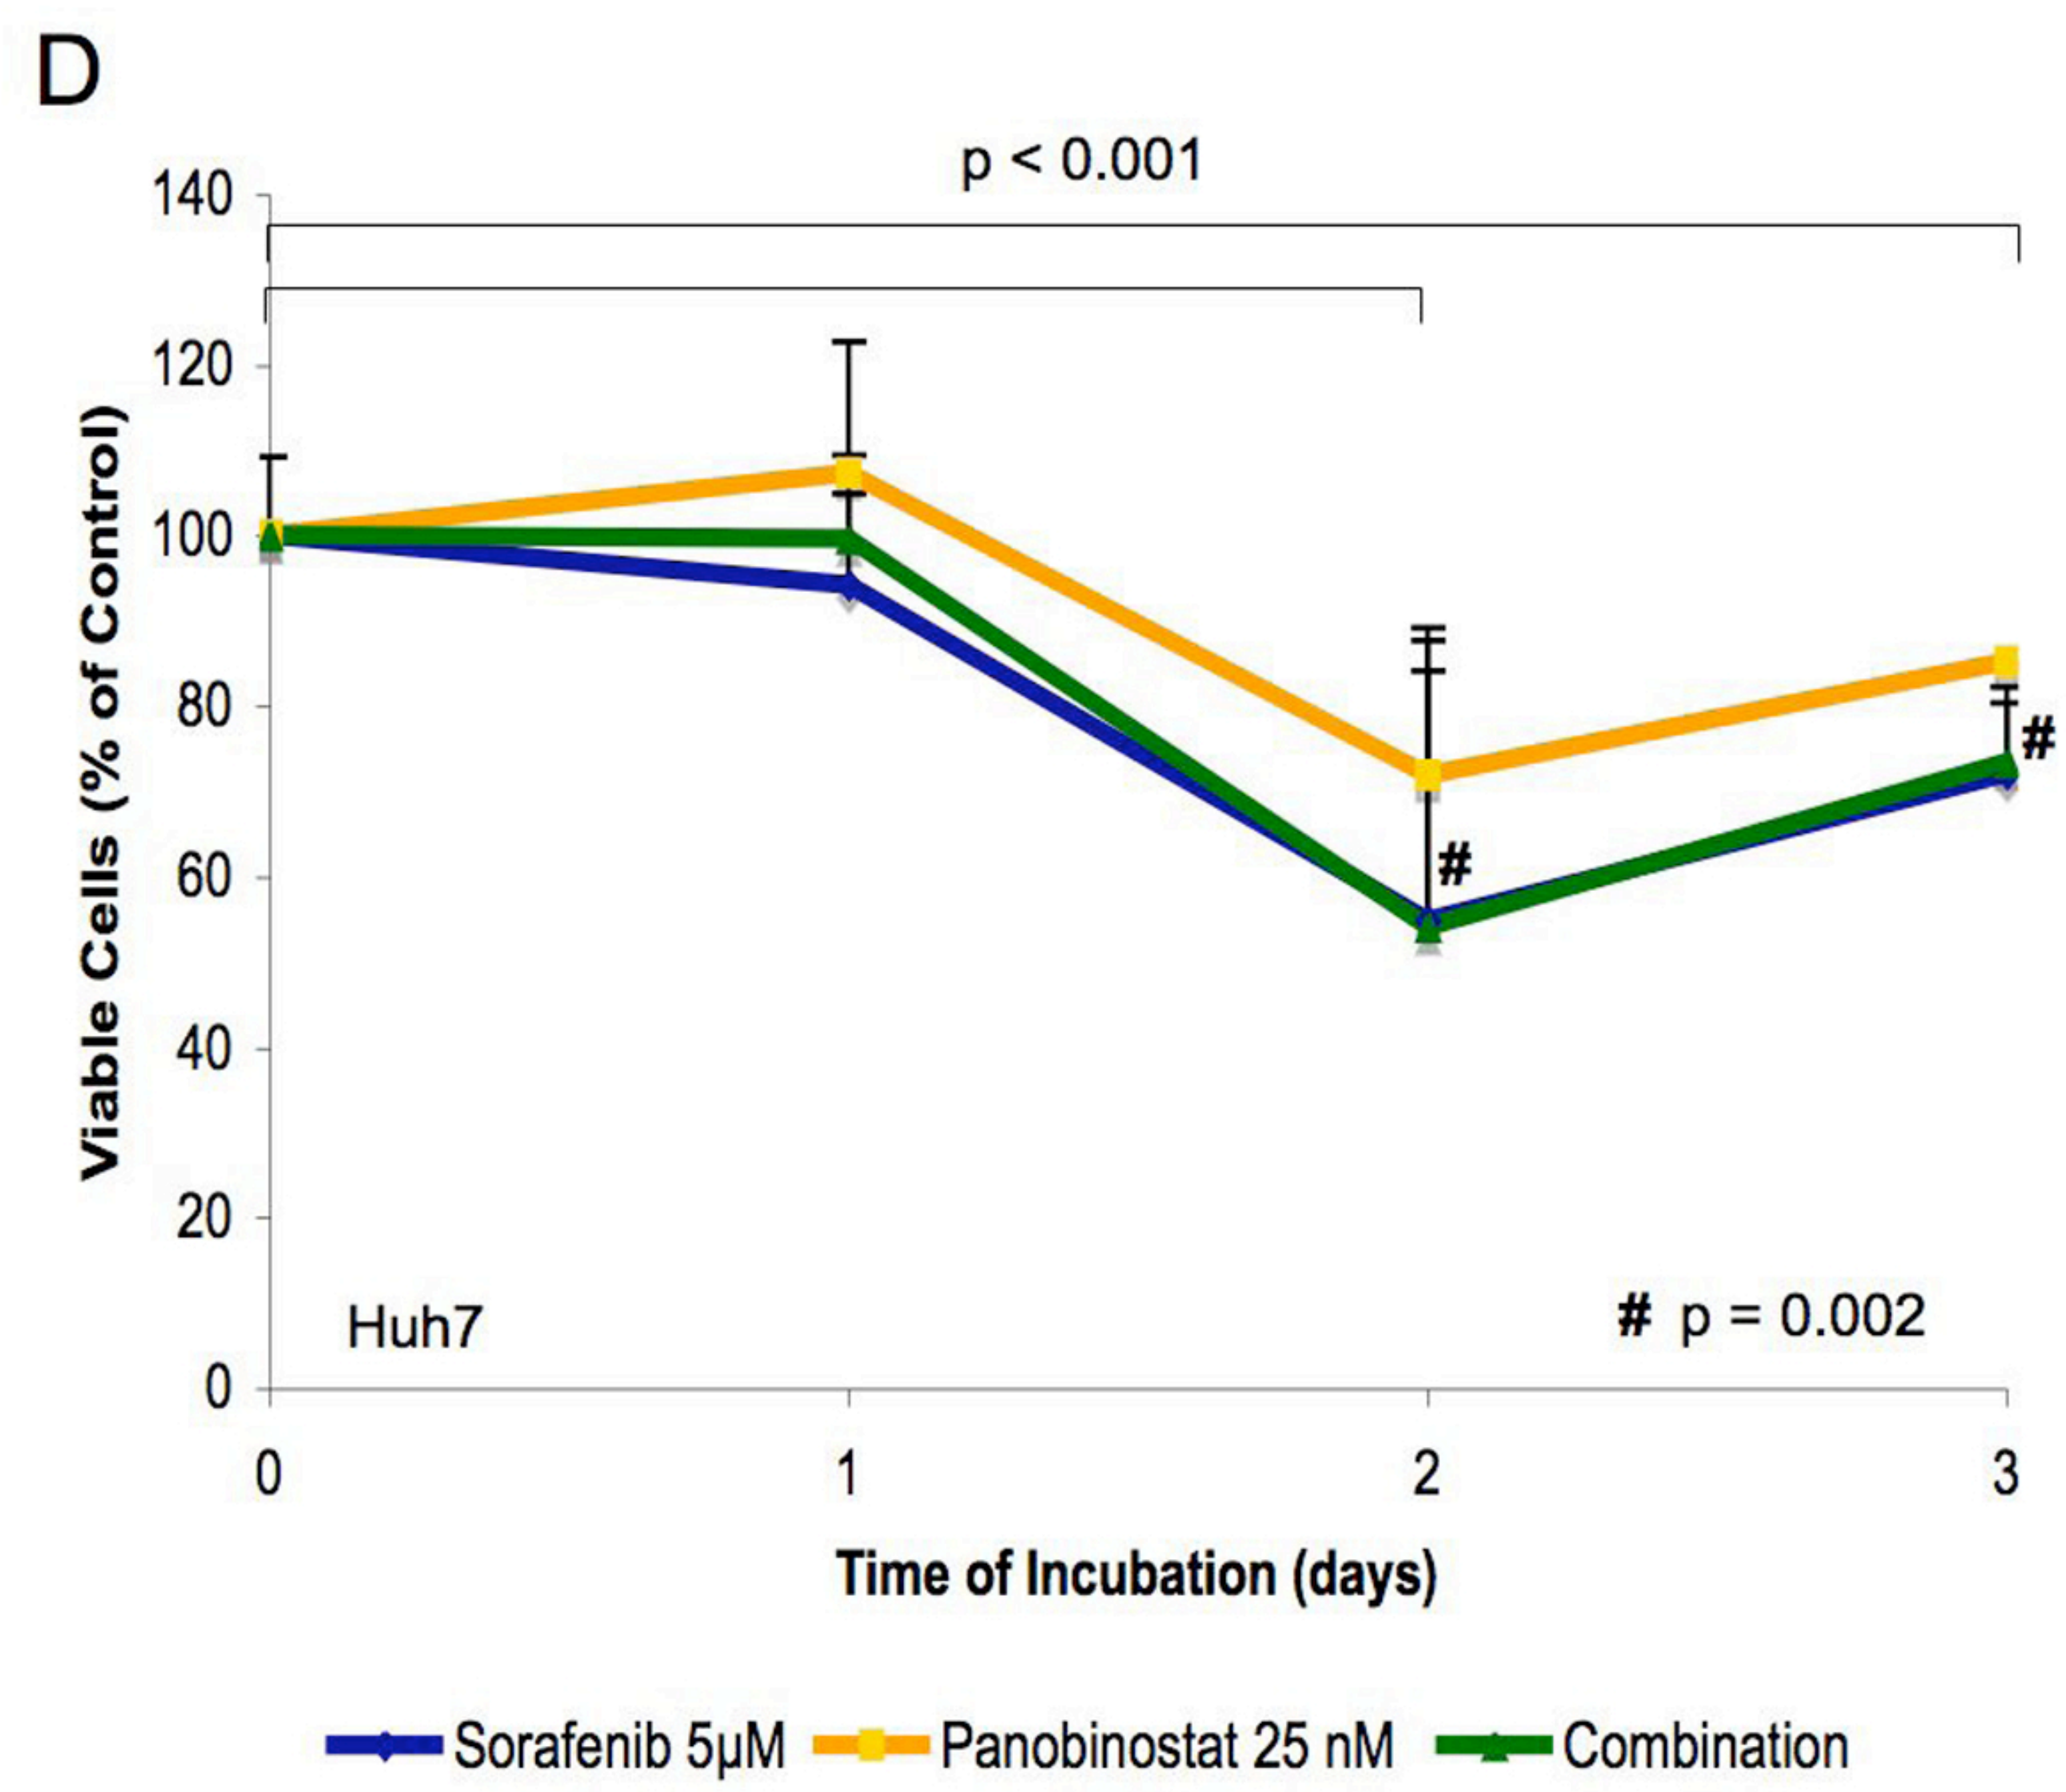

\* compared to sorafenib, # compared to panobinostat

Supplement: NIHMS355139-supplement-07.pdf [file NIHMS355139-supplement-07.pdf]

Suppl. Fig. 5

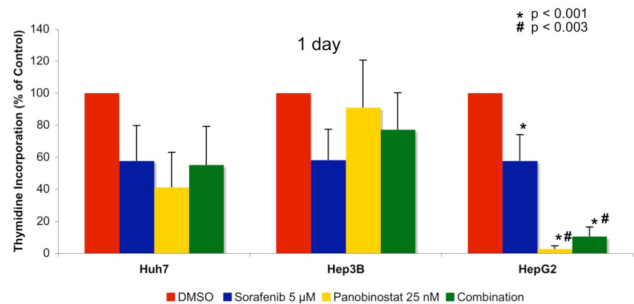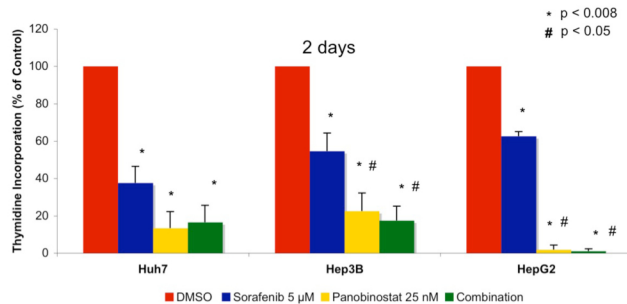

\* Compared to control, # compared to sorafenib

Supplement: NIHMS355139-supplement-08.pdf [file NIHMS355139-supplement-08.pdf]

Supplementary Fig. 6

A

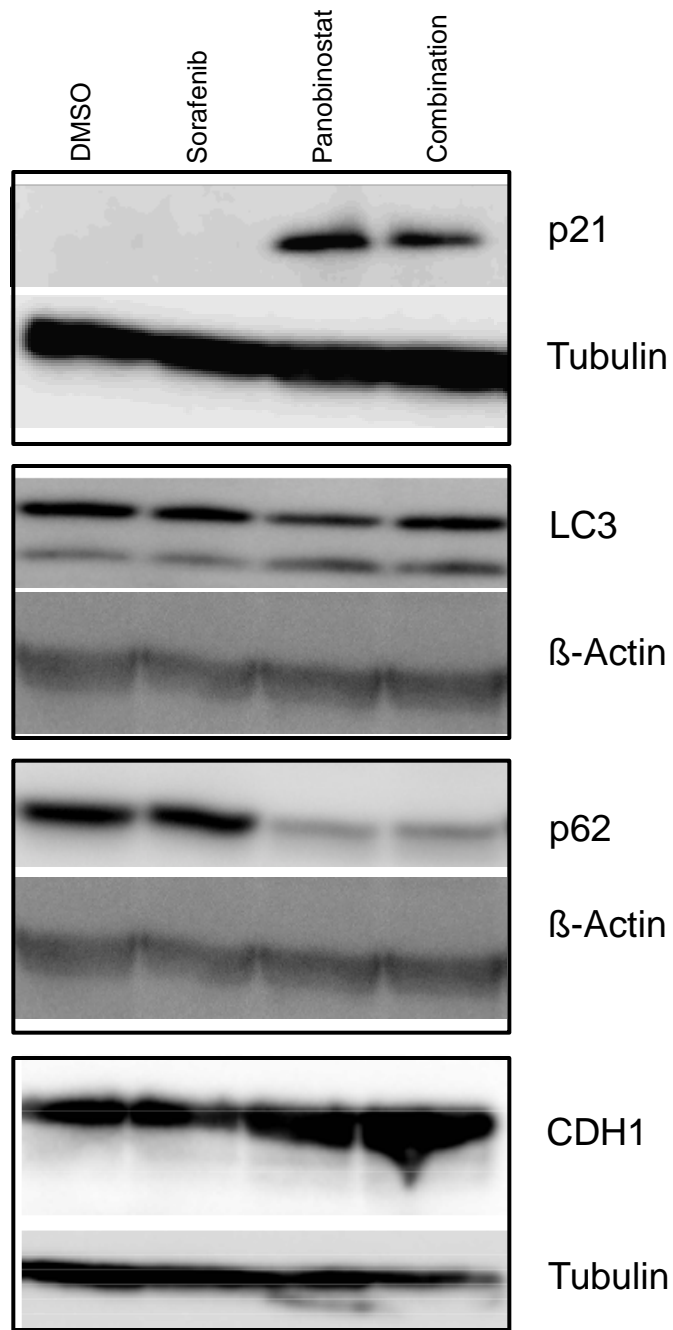

B

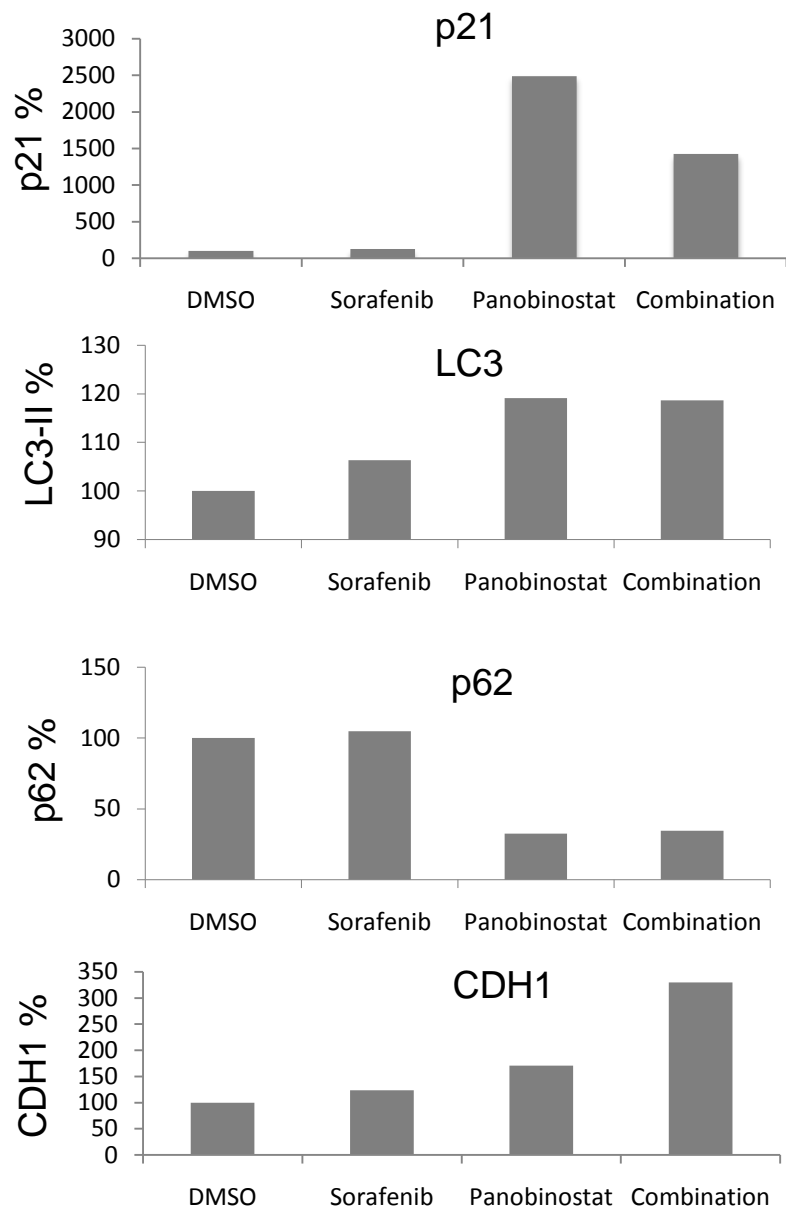

Supplement: NIHMS355139-supplement-09.pdf [file NIHMS355139-supplement-09.pdf]
